# Supplementary material
Source: publisher figshare collection journal article supplement (https://acs.figshare.com/ndownloader/files/3594687)
Supplement: Supplementary file 1 [file 3594687]

## Sheet: S_Table1
Entrez	IPI	GeneName	Counts	Values	Avg
269966	IPI00464141	Nup98 Nucleoporin 98	2	3.34553194 3.775311947	3.56042
70052	IPI00458908	Prpf4 U4/U6 small nuclear ribonucleoprotein Prp4	2	0.262038887 0.49803859	2.91205
20324	IPI00135660	Sdpr Serum deprivation-response protein	2	2.785718918 2.752166033	2.76894
269397	IPI00387517	Ss18l1 Synovial sarcoma translocation gene on chromosome 18-like 1	2	0.257106006 0.608910084	2.76586
216965	IPI00126860	Taok1 Serine/threonine-protein kinase TAO1	2	0.430148393 0.4374623	2.30535
93762	IPI00396739	Smarca5 SWI/SNF-related matrix-associated actin-dependent regulator of chromatin subfamily A member 5	2	2.307892084 2.22341609	2.26565
217124	IPI00420651	Ppp1r9b Isoform 1 of Neurabin-2	2	1.727759004 2.672998905	2.20038
76824	IPI00109033	Fam54b Isoform 1 of Protein FAM54B	2	1.976693988 1.941473007	1.95908
13211	IPI00339468	Dhx9 Isoform 2 of ATP-dependent RNA helicase A	2	1.261912942 2.601717949	1.93182
76884	IPI00405625	Cyfip2 Cytoplasmic FMR1-interacting protein 2	2	1.749212027 2.028924942	1.88907
13429	IPI00331291	Dnm1 dynamin	2	1.851047039 1.827162027	1.8391
20817	IPI00751009	Srpk2 serine/arginine-rich protein specific kinase 2	2	1.818266034 1.841706038	1.82999
223254	IPI00356904	Farp1 FERMRhoGEF (Arhgef) and pleckstrin domain protein 1	2	1.714985967 1.863242984	1.78911
51792	IPI00310091	Ppp2r1a Serine/threonine-protein phosphatase 2A 65 kDa regulatory subunit A alpha isoform	2	1.502172947 2.043606997	1.77289
21969	IPI00874810	Top1 Putative uncharacterized protein	2	0.579635024 0.550018787	1.77167
51810	IPI00458583	Hnrnpu Putative uncharacterized protein	2	0.628029704 0.517130673	1.76301
67834	IPI00459725	Idh3a Isoform 1 of Isocitrate dehydrogenase [NAD] subunit alpha, mitochondrial	2	1.784461021 1.728206992	1.75633
114228	IPI00130391	EG436523;Prss1;Tcrb-V20;Prss3 protease, serine, 1	2	1.760413051 1.646710992	1.70356
170718	IPI00126635	Idh3b Isocitrate dehydrogenase 3 (NAD+) beta	2	0.650253415 0.539628088	1.6955
14609	IPI00380273	Gja1 Gap junction protein	2	1.749678016 1.638246059	1.69396
15481	IPI00323357	Hspa8 Heat shock cognate 71 kDa protein	2	0.581271708 0.604901671	1.68676
66511	IPI00469107	2500003M10Rik Isoform 3 of Uncharacterized protein C1orf77 homolog	2	0.700212419 0.524269283	1.66778
100040233	IPI00416117	EG436523;Prss1;Tcrb-V20;Prss3;LOC100044144;ENSMUSG00000071517 similar to trypsinogen 15	2	1.733317971 1.566254973	1.64979
16906	IPI00230394	Lmnb1 Lamin-B1	2	1.697631001 1.592208982	1.64492
100043209	IPI00874692	100043209 similar to ribosomal protein L15	2	0.627458572 0.590839684	1.64312
66645	IPI00321266	Pspc1 Isoform 1 of Paraspeckle component 1	2	1.580850005 1.673444033	1.62715
53610	IPI00320016	Nono Isoform 1 of Non-POU domain-containing octamer-binding protein	2	0.593706071 0.639961183	1.62346
67300	IPI00648173	Cltc Clathrin, heavy polypeptide	2	1.494483948 1.750877023	1.62268
215690	IPI00229599	Nav1 Isoform 1 of Neuron navigator 1	2	1.604738951 1.635472059	1.62011
70350	IPI00129519	Basp1 Brain acid soluble protein 1	2	0.66955328 0.573896527	1.618
69912	IPI00177202	Nup43 Nucleoporin Nup43	2	0.577924311 0.674767971	1.60616
108083	IPI00336318	Pip4k2b Phosphatidylinositol-5-phosphate 4-kinase type-2 beta	2	1.576738 1.601796985	1.58927
211134	IPI00400411	Lzts1 Leucine zipper putative tumor suppressor 1	2	1.442091942 1.734400988	1.58825
214498	IPI00170345	Cdc73 Parafibromin	2	0.650413513 0.610687315	1.58749
21873	IPI00323349	Tjp2 Tight junction protein ZO-2	2	1.633707047 1.520027041	1.57687
52897	IPI00720112	D11Bwg0517e hexaribonucleotide binding protein 3 isoform 2	2	1.43967104 1.683627009	1.56165
52055	IPI00480432	Rab11fip5 RAB11 family interacting protein 5 (class I) isoform 1	2	1.455353022 1.647214055	1.55128
232813	IPI00880347	D430041B17Rik Isoform 2 of UPF0626 protein A	2	0.659701288 0.63060993	1.5508
23856	IPI00453851	Dido1 Isoform 1 of Death-inducer obliterator 1	2	1.559759974 1.485649943	1.5227
17257	IPI00775806	Mecp2 Isoform B of Methyl-CpG-binding protein 2	2	1.498443007 1.526550055	1.5125
22763	IPI00131810	Zfr Zinc finger RNA-binding protein	2	1.505635977 1.508823991	1.50723
22352	IPI00227299	Vim Vimentin	2	1.614699006 1.394443035	1.50457
102693	IPI00468120	Phldb1 Isoform 1 of Pleckstrin homology-like domain family B member 1	2	0.730290771 0.628759205	1.47988
22627	IPI00118384	Ywhae 14-3-3 protein epsilon	2	1.446503043 1.508317947	1.47741
380785	IPI00380950	Begain similar to Brain-enriched guanylate kinase-associated protein isoform 1	2	1.501695991 1.421296	1.4615
67959	IPI00857642	Puf60 Isoform 3 of Poly(U)-binding-splicing factor PUF60	2	1.310194016 1.605360985	1.45778
18676	IPI00123868	Phf2 PHD finger protein 2	2	1.652317047 1.260236979	1.45628
269061	IPI00225249	5730453I16Rik Isoform 1 of Cleavage and polyadenylation specificity factor subunit 7	2	0.664633989 0.710486829	1.45604
24012	IPI00875257	Rgs7 52 kDa protein	2	0.732394874 0.647996426	1.4543
243961	IPI00758339	Shank1 similar to SPANK-1 isoform 2	2	0.710411906 0.668710411	1.45152
12835	IPI00830749	Col6a3 Col6a3 protein	2	1.624629974 1.273188949	1.44891
11464	IPI00480406	Actc1 Putative uncharacterized protein	2	0.626455486 0.771158218	1.44652
100502903	IPI00112251	Tubb3 Tubulin beta-3 chain	2	0.763744175 0.633775413	1.44359
17448	IPI00323592	Mdh2 Malate dehydrogenase, mitochondrial	2	1.166617036 1.720327973	1.44347
14687	IPI00230193	Gnaz Guanine nucleotide-binding protein G(z) subunit alpha	2	1.308902025 1.573457003	1.44118
12816	IPI00121430	Col12a1 Isoform 1 of Collagen alpha-1(XII) chain	2	1.431329966 1.432721019	1.43203
17441	IPI00785314	Mog myelin oligodendrocyte glycoprotein	2	1.464558005 1.395262957	1.42991
68617	IPI00624581	1110012J17Rik Isoform 1 of Uncharacterized protein KIAA0802	2	1.437188983 1.418951035	1.42807
18521	IPI00221799	Pcbp2 Isoform 3 of Poly(rC)-binding protein 2	2	0.720637619 0.684100688	1.42472
68089	IPI00138691	Arpc4 Actin-related protein 2/3 complex subunit 4	2	1.507454991 1.338529944	1.42299
15530	IPI00515360	Hspg2 perlecan	2	0.7763834 0.644891381	1.41934
16907	IPI00126191	Lmnb2 Isoform B2 of Lamin-B2	2	1.380561948 1.443892002	1.41223
94242	IPI00115458	Tinagl1 Tubulointerstitial nephritis antigen-like	2	1.427121043 1.396126032	1.41162
11739	IPI00115564	Slc25a4 ADP/ATP translocase 1	2	1.364125967 1.449466944	1.4068
70762	IPI00226417	Dclk2 Doublecortin-like protein kinase	2	1.444638968 1.365007997	1.40482
12322	IPI00420725	Camk2a MKIAA0968 protein	2	1.338768959 1.462165952	1.40047
21894	IPI00465786	Tln1 Talin-1	2	1.392531037 1.405504942	1.39902
242274	IPI00875695	Lrrc7 leucine rich repeat containing 7	2	1.412027001 1.384690046	1.39836
74117	IPI00115627	Actr3 Actin-related protein 3	2	0.631763518 0.829269528	1.39438
54130	IPI00113895	Actr1a Alpha-centractin	2	1.167531013 1.60572803	1.38663
56195	IPI00751759	Ptbp2 Isoform 1 of Polypyrimidine tract-binding protein 2	2	0.675094426 0.776183724	1.38481
14580	IPI00117042	Gfap Isoform 1 of Glial fibrillary acidic protein	2	1.433794022 1.324175	1.37898
67785	IPI00453846	Zmym4 Isoform 1 of Zinc finger MYM-type protein 4	2	0.831094503 0.649943829	1.37091
83766	IPI00117981	Actl6b Actin-like protein 6B	2	0.768676221 0.695792198	1.36907
214899	IPI00849089	Jarid1a Histone demethylase JARID1A	2	1.481528044 1.244598031	1.36306
12764	IPI00322206	Cmas Isoform 1 of N-acylneuraminate cytidylyltransferase	2	0.745454013 0.730452478	1.35524
100040605	IPI00224505	OTTMUSG00000025606;Rpl13;OTTMUSG00000009186 60S ribosomal protein L13	2	1.040652037 0.599636674	1.35416
16978	IPI00762483	Lrrfip1 leucine rich repeat (in FLII) interacting protein 1 isoform 3	2	1.275815964 1.431017041	1.35342
622469	IPI00830743	Sfrs5 splicing factor, arginine/serine-rich 5	2	1.318557024 1.381765962	1.35016
14025	IPI00272308	Bcl11a Isoform 1 of B-cell lymphoma/leukemia 11A	2	1.188580036 1.511152029	1.34987
77053	IPI00460290	Unc84a SUN1	2	0.742007196 0.75001961	1.3405
12933	IPI00312527	Crmp1 Crmp1 protein	2	1.274705052 1.405663967	1.34018
268890	IPI00652675	Lsamp Putative uncharacterized protein	2	1.350355983 1.328338981	1.33935
432467	IPI00816884	Hnrnph3 heterogeneous nuclear ribonucleoprotein H3	2	1.307765007 1.35966897	1.33372
11733	IPI00755993	Ank1 Isoform 6 of Ankyrin-1	2	0.700817585 0.812832892	1.32859
12293	IPI00407868	Cacna2d1 Isoform 2D of Voltage-dependent calcium channel subunit alpha-2/delta-1	2	0.735034406 0.774068177	1.32618
20965	IPI00469548	Syn2 Isoform IIa of Synapsin-2	2	0.800109804 0.7131055	1.32607
545486	IPI00348094	Tubb1 Tubulin, beta 1	2	0.730022371 0.788479686	1.31904
11426	IPI00848566	Macf1 microtubule-actin crosslinking factor 1	2	0.725508273 0.798293412	1.31551
22154	IPI00117352	Tubb5 Tubulin beta-5 chain	2	0.703116179 0.833345771	1.31111
208158	IPI00816921	Map6d1 MAP6 domain-containing protein 1	2	0.75534749 0.771188021	1.3103
15571	IPI00122451	Elavl3 Isoform HuC-L of ELAV-like protein 3	2	1.384291053 1.224694014	1.30449
380684	IPI00114241	Nefh Neurofilament heavy polypeptide	2	1.287286043 1.320430994	1.30386
226251	IPI00831353	Ablim1 84 kDa protein	2	1.219895005 1.386167049	1.30303
12345	IPI00474883	Capzb Capping protein (Actin filament) muscle Z-line, beta	2	1.275951028 1.330039024	1.303
109676	IPI00227235	Ank2 Isoform 2 of Ankyrin-2	2	0.747672677 0.806253016	1.28889
14248	IPI00467104	Flii Protein flightless-1 homolog	2	1.233399987 1.344107985	1.28875
116838	IPI00462051	Rims2 Rims2 protein	2	0.825269282 0.734298885	1.28678
13144	IPI00117846	Dapk3 Death-associated protein kinase 3	2	0.737473071 0.823225796	1.28536
14677	IPI00467152	Gnai1 guanine nucleotide binding protein, alpha inhibiting 1	2	0.909326613 0.681987107	1.28301
13205	IPI00230035	Ddx3x ATP-dependent RNA helicase DDX3X	2	0.80472672 0.761655986	1.27779
77579	IPI00757312	Myh10 Myosin, heavy polypeptide 10, non-muscle	2	1.257591009 1.287806988	1.2727
21960	IPI00227126	Tnr Isoform 1 of Tenascin-R	2	1.168167949 1.376997948	1.27258
13175	IPI00468380	Dclk1 Isoform 1 of Serine/threonine-protein kinase DCLK1	2	1.296259046 1.248767972	1.27251
268932	IPI00411109	Caskin1 Isoform 1 of Caskin-1	2	0.765824974 0.810554981	1.26975
18810	IPI00230061	Plec1 Isoform PLEC-0 of Plectin-1	2	1.252310991 1.287001967	1.26966
19035	IPI00135686	Ppib Peptidyl-prolyl cis-trans isomerase B	2	1.263913989 1.274088025	1.269
19046	IPI00311873	Ppp1cb Serine/threonine-protein phosphatase PP1-beta catalytic subunit	2	0.761792779 0.817423582	1.26802
20411	IPI00468140	Sorbs1 Isoform 1 of Sorbin and SH3 domain-containing protein 1	2	1.298730969 1.228845	1.26379
14810	IPI00751834	Grin1 Glutamate receptor ionotropic NMDA1	2	0.783172429 0.800381124	1.26313
111173	IPI00117731	LOC100048600;Erc1 Isoform 1 of ELKS/RAB6-interacting/CAST family member 1	2	0.673870981 0.964080513	1.26061
432502	IPI00457852	EG432502 similar to ribosomal protein L6	2	1.080585003 1.436555982	1.25857
77531	IPI00664176	Anks1b Isoform 1 of Ankyrin repeat and sterile alpha motif domain-containing protein 1B	2	1.147992015 1.364344001	1.25617
100503504	IPI00648938	Agrn Isoform 1 of Agrin	2	1.318112016 1.193822026	1.25597
269116	IPI00329927	Nfasc Neurofascin	2	0.7824229 0.814972103	1.25256
18039	IPI00554928	Nefl Neurofilament light polypeptide	2	1.227381945 1.273507953	1.25044
77038	IPI00120571	Arfgap2 Isoform 1 of ADP-ribosylation factor GTPase-activating protein 2	2	0.781860471 0.818737388	1.2502
11641	IPI00649060	Palm2-akap2;Akap2;Palm2 Protein	2	1.245802045 1.253386021	1.24959
72630	IPI00224776	Hspa12b Heat shock 70 kDa protein 12B	2	0.879477084 0.734655321	1.24911
20740	IPI00798592	Spna2 spectrin alpha 2	2	1.216709018 1.279309988	1.24801
22589	IPI00322707	Atrx Transcriptional regulator ATRX	2	0.745230377 0.867056429	1.2476
56430	IPI00857685	Clip1 160 kDa protein	2	1.330842018 1.157102942	1.24397
21413	IPI00652159	Tcf4 Putative uncharacterized protein	2	0.727164328 0.900531292	1.24283
14886	IPI00395163	Gtf2i Isoform 6 of General transcription factor II-I	2	0.986168504 0.679777622	1.24255
28088	IPI00116850	D10Wsu52e UPF0027 protein C22orf28 homolog	2	0.853517413 0.762955487	1.24116
268859	IPI00886040	A2bp1 Isoform 4 of Fox-1 homolog A	2	1.337594986 1.144232035	1.24091
110052	IPI00227720	Dek Protein DEK	2	0.792911828 0.819518387	1.2407
71435	IPI00918972	Arhgap21 Rho GTPase activating protein 21 isoform 1	2	1.204120994 1.27482903	1.23948
12822	IPI00284816	Col18a1 Isoform 1 of Collagen alpha-1(XVIII) chain	2	0.817066908 0.800640702	1.23644
228550	IPI00153136	Itpka Inositol-trisphosphate 3-kinase A	2	0.758615494 0.867419004	1.23552
381979	IPI00515701	Brsk1 BR serine/threonine-protein kinase 1	2	1.235424042 1.228569031	1.232
109052	IPI00221797	Krt75 Keratin, type II cytoskeletal 75	2	0.787208796 0.84107691	1.22963
59013	IPI00224729	Hnrnph1 Heterogeneous nuclear ribonucleoprotein H1	2	1.265486956 1.191009045	1.22825
231570	IPI00857016	A830010M20Rik 43 kDa protein	2	0.841113687 0.79045248	1.227
381921	IPI00420553	Taok2 Serine/threonine-protein kinase TAO2	2	1.246983051 1.202594995	1.22479
50926	IPI00755892	Hnrpdl heterogeneous nuclear ribonucleoprotein D-like	2	1.125059009 1.319125056	1.22209
100336	IPI00648685	Ppp1r8 Protein phosphatase 1, regulatory (Inhibitor) subunit 8	2	1.136690021 1.299950004	1.21832
665433	IPI00265761	Hist1h2ac;Hist1h2ag;Hist1h2ao;Hist1h2ai;Hist1h2ab;Hist1h2an;RP23-480B19.10;Hist1h2ad;Hist1h2ae Histone H2A type 1	2	1.228441 1.206451058	1.21745
100039940	IPI00136929	Actg1 Gamma actin-like protein	2	0.827545583 0.817490101	1.21582
21411	IPI00407458	Tcf20 transcription factor 20 isoform a	2	0.990252018 1.420586944	1.21522
100048522	IPI00407543	Cfl1 Putative uncharacterized protein	2	0.845709383 0.803726792	1.21332
241656	IPI00225805	Pak7 Serine/threonine-protein kinase PAK 7	2	0.817180395 0.835434318	1.21035
68507	IPI00921638	Ppfia4 protein tyrosine phosphatase, receptor type, f polypeptide (PTPRF), interacting protein (liprin), alpha 4	2	0.788554072 0.873435378	1.20652
327814	IPI00224775	Ppfia2 Liprin-alpha-2	2	0.860565782 0.80016309	1.20589
15507	IPI00468068	Hspb1 Isoform B of Heat shock protein beta-1	2	1.172140956 1.231899977	1.20202
19132	IPI00230444	Prph Isoform 3u of Peripherin	2	0.842487812 0.823642313	1.20054
380768	IPI00421140	Gm1568 hypothetical protein LOC380768	2	1.172713995 1.227640986	1.20018

## Sheet: S_Table2
clique_community	Hit_counts	Expression_score	members	members_genesym	GO_terms
K=3_1	2	1.33333	16906 12534 18810	Lmnb1 Cdk1 Plec	GO:0042446_hormone biosynthetic process_0.0460620258218027 GO:0007569_cell aging_0.00229783383423715 GO:0051301_cell division_0.0258653056152407 GO:0006323_DNA packaging_0.00194455029415747 GO:0045740_positive regulation of DNA replication_0.00159118336611247 GO:0007093_mitotic cell cycle checkpoint_0.00159118336611247 GO:0045787_positive regulation of cell cycle_0.00326893368059581 GO:0046620_re…
K=5_6	3	1.2	54401 14810 14812 11461 21872	Ywhab Grin1 Grin2b Actb Tjp1	GO:0050906_detection of stimulus involved in sensory perception_0.00676269203280597 GO:0051291_protein heterooligomerization_0.0115916108095405 GO:0033555_multicellular organismal response to stress_0.00617608839354814 GO:0043524_negative regulation of neuron apoptosis_0.00895998921377091 GO:0007631_feeding behavior_4.42484846368973e-05 GO:0007268_synaptic transmission_0.000115168857571322 GO:000…
K=4_1	2	1	15481 269966 22030 76582	Hspa8 Nup98 Traf2 Ipo11	GO:0006606_protein import into nucleus_0.00353320131582827 GO:0051099_positive regulation of binding_0.0069397215048742 GO:0051291_protein heterooligomerization_0.00928395165695468 GO:0051092_positive regulation of NF-kappaB transcription factor activity_0.00341557900654339 GO:0030163_protein catabolic process_0.0200139979184846 GO:0051084_'de novo' posttranslational protein folding_0.00176777305…
K=4_2	2	1	20817 110809 19826 22185	Srpk2 Srsf1 Rnps1 U2af2	GO:0022618_ribonucleoprotein complex assembly_0.00318030314913958
K=4_4	2	1	15481 381979 232791 18749	Hspa8 Brsk1 Cnot3 Prkacb	GO:0051084_'de novo' posttranslational protein folding_0.0017677730592399 GO:0000077_DNA damage checkpoint_0.00223878311160131 GO:0042446_hormone biosynthetic process_0.0014266050882237 GO:0018105_peptidyl-serine phosphorylation_0.00341557900654339 GO:0007163_establishment or maintenance of cell polarity_0.00388600577338877 GO:0000086_G2/M transition of mitotic cell cycle_0.000471635535947959 GO:…
K=6_3	3	1	54401 18752 14810 14812 22628 16367	Ywhab Prkcc Grin1 Grin2b Ywhag Irs1	GO:0048732_gland development_0.0159902943128268 GO:0050796_regulation of insulin secretion_0.0105671600996103 GO:0050906_detection of stimulus involved in sensory perception_0.00810985158363867 GO:0051291_protein heterooligomerization_7.98515959113766e-05 GO:0030072_peptide hormone secretion_0.00687929149774697 GO:0090277_positive regulation of peptide hormone secretion_0.00529527367665545 GO:004…
K=6_7	3	0.857143	54401 110157 14810 14812 18754 20779 22628	Ywhab Raf1 Grin1 Grin2b Prkce Src Ywhag	GO:0050906_detection of stimulus involved in sensory perception_0.00945522360779249 GO:0051291_protein heterooligomerization_0.0161910192351074 GO:0007268_synaptic transmission_0.000240772948521194 GO:0007292_female gamete generation_0.0047372360652615 GO:0001666_response to hypoxia_0.0141540278479054 GO:0042446_hormone biosynthetic process_0.00484014649115616 GO:0014070_response to organic cycli…
K=5_4	2	0.8	15481 54401 67300 12757 29816	Hspa8 Ywhab Cltc Clta Hip1r	GO:0051291_protein heterooligomerization_0.0115916108095405 GO:0051084_'de novo' posttranslational protein folding_0.00220926036328847 GO:0006898_receptor-mediated endocytosis_0.00367993006796013
K=5_5	2	0.8	15481 15499 81489 193740 56424	Hspa8 Hsf1 Dnajb1 Hspa1a Stub1	GO:0032680_regulation of tumor necrosis factor production_0.00441461433506772 GO:0040014_regulation of multicellular organism growth_0.00983781845314902 GO:0000209_protein polyubiquitination_0.00220926036328847 GO:0006986_response to unfolded protein_0.00632276527996506 GO:0051084_'de novo' posttranslational protein folding_1.8238430456073e-06 GO:0031331_positive regulation of cellular catabolic …
K=6_3	2	0.666667	15481 74737 108062 66899 94230 98985	Hspa8 Pcf11 Cstf2 Fip1l1 Cpsf1 Clp1	GO:0051084_'de novo' posttranslational protein folding_0.00265056542283589 GO:0008033_tRNA processing_0.0121441778825192
K=6_8	2	0.666667	15481 269966 66679 18226 71805 70572	Hspa8 Nup98 Rae1 Nup62 Nup93 Ipo5	GO:0051084_'de novo' posttranslational protein folding_0.00265056542283589 GO:0043407_negative regulation of MAP kinase activity_0.00476680010198148 GO:0007569_cell aging_0.0045905902578069 GO:0042059_negative regulation of epidermal growth factor receptor signaling pathway_0.000530582155784028
K=5_8	6	0.631579	26413 54401 18752 14694 110157 14810 14812 18750 18753 18754 20779 22628 26417 51792 16367 19052 67300 22330 18751	Mapk1 Ywhab Prkcc Gnb2l1 Raf1 Grin1 Grin2b Prkca Prkcd Prkce Src Ywhag Mapk3 Ppp2r1a Irs1 Ppp2ca Cltc Vcl Prkcb	GO:0048732_gland development_0.049773536764861 GO:0050796_regulation of insulin secretion_0.0330874157764161 GO:0046324_regulation of glucose import_6.20282265411471e-05 GO:0050906_detection of stimulus involved in sensory perception_0.0254611020706495 GO:0007059_chromosome segregation_0.0221752680966711 GO:0048259_regulation of receptor-mediated endocytosis_0.00447281731107019 GO:0051291_protein…
K=4_1	1	0.5	20404 13429 20405 20408	Sh3gl2 Dnm1 Sh3gl1 Sh3gl3	GO:0006898_receptor-mediated endocytosis_0.00294498563586014
K=4_2	1	0.5	15481 209018 71732 80743	Hspa8 Vps8 Vps11 Vps16	GO:0051084_'de novo' posttranslational protein folding_0.0017677730592399
K=4_3	1	0.5	15481 245944 224705 68299	Hspa8 Vps54 Vps52 Vps53	GO:0048872_homeostasis of number of cells_0.00705703171762576 GO:0051084_'de novo' posttranslational protein folding_0.0017677730592399 GO:0016197_endosome transport_0.00306264959979159 GO:0001894_tissue homeostasis_0.00752616863778422
K=4_4	1	0.5	15481 15516 15254 57869	Hspa8 Hsp90ab1 Hint1 Adck2	GO:0051084_'de novo' posttranslational protein folding_0.0017677730592399
K=4_5	1	0.5	14609 20779 12389 12988	Gja1 Src Cav1 Csk	GO:0048732_gland development_0.0106884960828556 GO:0048754_branching morphogenesis of a tube_0.0120915465555259 GO:0019229_regulation of vasoconstriction_0.00388600577338877 GO:0043407_negative regulation of MAP kinase activity_0.00318030314913958 GO:0050880_regulation of blood vessel size_0.00506134405677959 GO:0010906_regulation of glucose metabolic process_0.00365081321298781 GO:0001570_vascul…
K=4_7	1	0.5	54401 218038 13429 30948	Ywhab Amph Dnm1 Bin1	GO:0051291_protein heterooligomerization_0.00928395165695468 GO:0042692_muscle cell differentiation_0.00541374263314577 GO:0006898_receptor-mediated endocytosis_0.00294498563586014
K=4_8	1	0.5	15481 27096 66226 66682	Hspa8 Trappc3 Trappc2 Trappc5	GO:0051084_'de novo' posttranslational protein folding_0.0017677730592399 GO:0006888_ER to Golgi vesicle-mediated transport_0.00212104622837653
K=4_9	1	0.5	15481 73078 66865 69740	Hspa8 Pmpcb Pmpca Dph5	GO:0051084_'de novo' posttranslational protein folding_0.0017677730592399
K=4_3	1	0.5	15481 231329 68991 12572	Hspa8 Polr2b Ssu72 Cdk7	GO:0051084_'de novo' posttranslational protein folding_0.0017677730592399 GO:0042446_hormone biosynthetic process_0.0014266050882237 GO:0051301_cell division_0.0343380400800667
K=4_5	1	0.5	15481 106344 214901 320632	Hspa8 Rfc4 Chtf18 Snrnp200	GO:0051084_'de novo' posttranslational protein folding_0.0017677730592399 GO:0042446_hormone biosynthetic process_1.49124860295771e-05
K=7_3	2	0.5	15481 11461 11740 19766 21937 22029 22030 56532	Hspa8 Actb Slc25a5 Ripk1 Tnfrsf1a Traf1 Traf2 Ripk3	GO:0051291_protein heterooligomerization_6.75180027873474e-07 GO:0051092_positive regulation of NF-kappaB transcription factor activity_0.0068198927880355 GO:0051084_'de novo' posttranslational protein folding_0.00353262908783623 GO:0042446_hormone biosynthetic process_0.000199247537377624 GO:0051099_positive regulation of binding_0.0138320939694921 GO:0050729_positive regulation of inflammatory …
K=7_3	2	0.444444	13627 15481 331026 69719 231659 11966 20174 245474 55989	Eef1a1 Hspa8 Gmppb Cad Gcn1l1 Atp6v1b2 Ruvbl2 Dkc1 Nop58	GO:0009451_RNA modification_0.00872292450642678 GO:0006606_protein import into nucleus_0.00793273585552809 GO:0051084_'de novo' posttranslational protein folding_0.00397338783293184 GO:0046777_protein autophosphorylation_0.0210297206884919 GO:0042446_hormone biosynthetic process_0.00812759980143113 GO:0022613_ribonucleoprotein complex biogenesis_0.0150243205201339 GO:0006754_ATP biosynthetic proc…
K=5_2	1	0.4	15481 107182 21374 319178 66923	Hspa8 Btaf1 Tbp Hist1h2bb Pbrm1	GO:0051084_'de novo' posttranslational protein folding_0.00220926036328847 GO:0006383_transcription from RNA polymerase III promoter_0.00029479393749927 GO:0006367_transcription initiation from RNA polymerase II promoter_0.00206209792860561 GO:0006366_transcription from RNA polymerase II promoter_0.00705588996136112 GO:0007507_heart development_0.0222070504334162 GO:0006334_nucleosome assembly_0.…
K=5_3	1	0.4	15481 233904 69544 213464 74322	Hspa8 Setd1a Wdr5b Rbbp5 Cxxc1	GO:0051084_'de novo' posttranslational protein folding_0.00220926036328847
K=5_6	1	0.4	13627 15481 67279 12468 59053	Eef1a1 Hspa8 Med31 Cct7 Fam203a	GO:0051084_'de novo' posttranslational protein folding_0.00220926036328847 GO:0042446_hormone biosynthetic process_0.0023531098705223
K=5_7	2	0.4	15481 74737 108062 19047 66899 94230 98985 54188 68991 56522	Hspa8 Pcf11 Cstf2 Ppp1cc Fip1l1 Cpsf1 Clp1 Cpsf4 Ssu72 Papolb	GO:0008033_tRNA processing_0.0201594295048536 GO:0051084_'de novo' posttranslational protein folding_0.0044139646128117 GO:0005977_glycogen metabolic process_0.0102719731179913
K=5_3	1	0.4	15481 20249 75751 106529 13358	Hspa8 Scd1 Ipo4 Tecr Slc25a1	GO:0006606_protein import into nucleus_0.00441461433506772 GO:0051084_'de novo' posttranslational protein folding_0.00220926036328847 GO:0042742_defense response to bacterium_0.0190175262879313 GO:0022613_ribonucleoprotein complex biogenesis_0.00837442391798972 GO:0050830_defense response to Gram-positive bacterium_0.00441461433506772 GO:0045444_fat cell differentiation_0.00910633730597479 GO:004…
K=5_7	1	0.4	13627 15481 213827 70428 27395	Eef1a1 Hspa8 Arcn1 Polr3b Mrpl15	GO:0051084_'de novo' posttranslational protein folding_0.00220926036328847 GO:0007005_mitochondrion organization_0.0118836677737611 GO:0009615_response to virus_0.0107150255414838 GO:0045087_innate immune response_0.0174196460324646 GO:0006412_translation_0.037172692755517
K=5_0	1	0.4	15481 19646 15182 19645 20683	Hspa8 Rbbp4 Hdac2 Rb1 Sp1	GO:0048592_eye morphogenesis_0.00558920762962856 GO:0031345_negative regulation of cell projection organization_0.00500204964286892 GO:0051084_'de novo' posttranslational protein folding_0.00220926036328847 GO:0001889_liver development_0.00720246295823739 GO:0007050_cell cycle arrest_0.00749555702485368 GO:0030097_hemopoiesis_0.0105688675509897 GO:0001701_in utero embryonic development_0.02827310…
K=5_3	1	0.4	13627 15481 18479 14784 57257	Eef1a1 Hspa8 Pak1 Grb2 Vav3	GO:0001525_angiogenesis_0.0190175262879313 GO:0051291_protein heterooligomerization_0.0115916108095405 GO:0051084_'de novo' posttranslational protein folding_0.00220926036328847 GO:0035023_regulation of Rho protein signal transduction_0.00998406283053756 GO:0046777_protein autophosphorylation_0.0117376479226859 GO:0007229_integrin-mediated signaling pathway_0.0101302899274845 GO:0001666_response …
K=5_8	1	0.4	20528 16211 14694 27979 11461	Slc2a4 Kpnb1 Gnb2l1 Eif3b Actb	GO:0042593_glucose homeostasis_0.0069092996533951 GO:0006606_protein import into nucleus_0.00441461433506772 GO:0015758_glucose transport_0.00441461433506772 GO:0006412_translation_0.037172692755517 GO:0006413_translational initiation_0.00426771216519448 GO:0007409_axonogenesis_0.0131970698927647 GO:0045444_fat cell differentiation_0.00910633730597479
K=5_9	1	0.4	15481 74148 16785 20174 270627	Hspa8 1300001I01Rik Rpsa Ruvbl2 Taf1	GO:0051084_'de novo' posttranslational protein folding_0.00220926036328847 GO:0042446_hormone biosynthetic process_0.0023531098705223 GO:0006412_translation_0.037172692755517
K=8_7	2	0.363636	15481 217737 15516 22218 72354 19060 21770 74006 20867 14677 67738	Hspa8 Ahsa1 Hsp90ab1 Sumo1 Ttc4 Ppp5c Ppp2r5d Dnm1l Stip1 Gnai1 Ppid	GO:0051291_protein heterooligomerization_0.0253265330232293 GO:0051084_'de novo' posttranslational protein folding_0.00485435949723541 GO:0014070_response to organic cyclic compound_0.0221532071328148 GO:0043279_response to alkaloid_0.0122561144235123 GO:0031645_negative regulation of neurological system process_0.0106513081391459 GO:0051970_negative regulation of transmission of nerve impulse_0.…
K=9_3	2	0.363636	15481 217737 15516 22218 72354 19060 21770 74006 20867 14677 67738	Hspa8 Ahsa1 Hsp90ab1 Sumo1 Ttc4 Ppp5c Ppp2r5d Dnm1l Stip1 Gnai1 Ppid	GO:0051291_protein heterooligomerization_0.0253265330232293 GO:0051084_'de novo' posttranslational protein folding_0.00485435949723541 GO:0014070_response to organic cyclic compound_0.0221532071328148 GO:0043279_response to alkaloid_0.0122561144235123 GO:0031645_negative regulation of neurological system process_0.0106513081391459 GO:0051970_negative regulation of transmission of nerve impulse_0.…
K=10_2	2	0.363636	15481 217737 15516 22218 72354 19060 21770 74006 20867 14677 67738	Hspa8 Ahsa1 Hsp90ab1 Sumo1 Ttc4 Ppp5c Ppp2r5d Dnm1l Stip1 Gnai1 Ppid	GO:0051291_protein heterooligomerization_0.0253265330232293 GO:0051084_'de novo' posttranslational protein folding_0.00485435949723541 GO:0014070_response to organic cyclic compound_0.0221532071328148 GO:0043279_response to alkaloid_0.0122561144235123 GO:0031645_negative regulation of neurological system process_0.0106513081391459 GO:0051970_negative regulation of transmission of nerve impulse_0.…
K=11_1	2	0.363636	15481 217737 15516 22218 72354 19060 21770 74006 20867 14677 67738	Hspa8 Ahsa1 Hsp90ab1 Sumo1 Ttc4 Ppp5c Ppp2r5d Dnm1l Stip1 Gnai1 Ppid	GO:0051291_protein heterooligomerization_0.0253265330232293 GO:0051084_'de novo' posttranslational protein folding_0.00485435949723541 GO:0014070_response to organic cyclic compound_0.0221532071328148 GO:0043279_response to alkaloid_0.0122561144235123 GO:0031645_negative regulation of neurological system process_0.0106513081391459 GO:0051970_negative regulation of transmission of nerve impulse_0.…
K=4_0	1	0.333333	15481 11966 104184 16434 68441 73419	Hspa8 Atp6v1b2 Blmh Itpa Rraga 1700052N19Rik	GO:0006754_ATP biosynthetic process_0.0133692986367039 GO:0034220_ion transmembrane transport_0.00705516364588349 GO:0042493_response to drug_0.0158157419761983 GO:0051084_'de novo' posttranslational protein folding_0.00265056542283589 GO:0009636_response to toxin_0.00670339339138809 GO:0015992_proton transport_0.00933914076750305
K=5_1	1	0.333333	15481 11966 104184 16434 68441 73419	Hspa8 Atp6v1b2 Blmh Itpa Rraga 1700052N19Rik	GO:0006754_ATP biosynthetic process_0.0133692986367039 GO:0034220_ion transmembrane transport_0.00705516364588349 GO:0042493_response to drug_0.0158157419761983 GO:0051084_'de novo' posttranslational protein folding_0.00265056542283589 GO:0009636_response to toxin_0.00670339339138809 GO:0015992_proton transport_0.00933914076750305
K=5_5	1	0.333333	20528 67834 11429 66904 15356 56794	Slc2a4 Idh3a Aco2 Pccb Hmgcl Hacl1	GO:0042593_glucose homeostasis_0.00828554211001578 GO:0006084_acetyl-CoA metabolic process_2.1315926728001e-05 GO:0006767_water-soluble vitamin metabolic process_0.0110930656290878 GO:0043648_dicarboxylic acid metabolic process_0.00652746932374184 GO:0006637_acyl-CoA metabolic process_0.00423809257212374 GO:0051187_cofactor catabolic process_1.20972016421151e-05 GO:0015758_glucose transport_0.005…
K=5_8	1	0.333333	15481 15182 627352 217707 20466 228829	Hspa8 Hdac2 Morf4l1 Coq6 Sin3a Phf20	GO:0009108_coenzyme biosynthetic process_0.0117939106295795 GO:0031345_negative regulation of cell projection organization_0.00599954132242494 GO:0051084_'de novo' posttranslational protein folding_0.00265056542283589 GO:0001701_in utero embryonic development_0.0338315586740593 GO:0006338_chromatin remodeling_0.0051191418083379
K=5_9	1	0.333333	13627 15481 24061 13006 546778 20842	Eef1a1 Hspa8 Smc1a Smc3 Stag1	GO:0007059_chromosome segregation_0.00588268265830667 GO:0051084_'de novo' posttranslational protein folding_0.00220926036328847 GO:0007067_mitosis_1.68870089956428e-06 GO:0051301_cell division_6.42809657486895e-06 GO:0007126_meiosis_4.18124829476112e-05
K=5_0	1	0.333333	52432 19053 110854 12953 21770 51792	Ppp2r2d Ppp2cb Ppp2r4 Cry2 Ppp2r5d Ppp2r1a	GO:0006606_protein import into nucleus_0.00529527367665545 GO:0007059_chromosome segregation_0.00705516364588349 GO:0030163_protein catabolic process_0.0298711516132038 GO:0042542_response to hydrogen peroxide_0.00617554329232595 GO:0007623_circadian rhythm_0.00846120670268073 GO:0043687_post-translational protein modification_0.0114639537134097
K=5_1	1	0.333333	15481 269523 14121 18786 22230 224111	Hspa8 Vcp Fbp1 Plaa Ufd1l Ubxn7	GO:0006094_gluconeogenesis_0.00388549086953705 GO:0030163_protein catabolic process_0.000373990682524139 GO:0051084_'de novo' posttranslational protein folding_0.00265056542283589 GO:0042446_hormone biosynthetic process_0.00349324482818801 GO:0006919_activation of caspase activity_0.00476680010198148 GO:0006888_ER to Golgi vesicle-mediated transport_0.00317997531543416
K=6_6	1	0.333333	15481 15182 627352 217707 20466 228829	Hspa8 Hdac2 Morf4l1 Coq6 Sin3a Phf20	GO:0031345_negative regulation of cell projection organization_0.00599954132242494 GO:0051084_'de novo' posttranslational protein folding_0.00265056542283589 GO:0001701_in utero embryonic development_0.0338315586740593 GO:0009108_coenzyme biosynthetic process_0.0117939106295795 GO:0006338_chromatin remodeling_0.0051191418083379
K=6_9	1	0.333333	15481 269523 14121 18786 22230 224111	Hspa8 Vcp Fbp1 Plaa Ufd1l Ubxn7	GO:0006094_gluconeogenesis_0.00388549086953705 GO:0051084_'de novo' posttranslational protein folding_0.00265056542283589 GO:0042446_hormone biosynthetic process_0.00349324482818801 GO:0030163_protein catabolic process_0.000373990682524139 GO:0006919_activation of caspase activity_0.00476680010198148 GO:0006888_ER to Golgi vesicle-mediated transport_0.00317997531543416
K=6_0	1	0.333333	15481 232791 231464 234594 69125 72068	Hspa8 Cnot3 Cnot6l Cnot1 Cnot8 Cnot2	GO:0051084_'de novo' posttranslational protein folding_0.00265056542283589
K=6_1	1	0.333333	13627 15481 102058 105504 211446 54401	Eef1a1 Hspa8 Exoc8 Exoc5 Exoc3 Ywhab	GO:0051291_protein heterooligomerization_0.0138939626522663 GO:0051084_'de novo' posttranslational protein folding_0.00265056542283589 GO:0022406_membrane docking_0.00282706141479763
K=6_5	1	0.333333	13627 15481 12411 20334 77371 74498	Eef1a1 Hspa8 Cbs Sec23a Sec24a Gorasp1	GO:0051084_'de novo' posttranslational protein folding_0.00265056542283589 GO:0044272_sulfur compound biosynthetic process_0.00635151929174298 GO:0001503_ossification_0.013719100486996 GO:0008652_cellular amino acid biosynthetic process_0.00740683007974808 GO:0006888_ER to Golgi vesicle-mediated transport_3.98444114047622e-06
K=6_3	1	0.333333	15481 208144 217995 109075 66583 675032	Hspa8 Dhx37 Heatr1 Exosc4 Exosc1	GO:0051084_'de novo' posttranslational protein folding_0.00220926036328847 GO:0042446_hormone biosynthetic process_0.0023531098705223 GO:0006364_rRNA processing_4.42484846368973e-05
K=6_6	1	0.333333	13627 15481 245474 208643 433702 630527	Eef1a1 Hspa8 Dkc1 Eif4g1 Ncbp1	GO:0009451_RNA modification_0.00485521681860277 GO:0031047_gene silencing by RNA_0.00426771216519448 GO:0051084_'de novo' posttranslational protein folding_0.00220926036328847 GO:0006412_translation_0.037172692755517 GO:0009452_RNA capping_0.000736854484707116 GO:0006364_rRNA processing_0.0105688675509897
K=6_8	1	0.333333	15481 54401 22631 26406 269523 78294	Hspa8 Ywhab Ywhaz Map3k3 Vcp Rps27a-ps2	GO:0051291_protein heterooligomerization_0.0138939626522663 GO:0051084_'de novo' posttranslational protein folding_0.00265056542283589 GO:0046777_protein autophosphorylation_0.0140687989816918 GO:0042446_hormone biosynthetic process_0.00349324482818801 GO:0006626_protein targeting to mitochondrion_0.00282706141479763 GO:0030163_protein catabolic process_0.0298711516132038 GO:0042493_response to d…
K=6_2	1	0.333333	54401 15516 20528 19989 20102 11461	Ywhab Hsp90ab1 Slc2a4 Rpl7 Rps4x Actb	GO:0042593_glucose homeostasis_0.00828554211001578 GO:0051291_protein heterooligomerization_0.0138939626522663 GO:0015758_glucose transport_0.00529527367665545 GO:0006412_translation_0.000834230326711484 GO:0007409_axonogenesis_0.0158157419761983 GO:0045444_fat cell differentiation_0.0109177896747505
K=7_7	2	0.307692	15481 22153 16151 18034 18037 19697 18033 16150 19698 26410 18035 67300 19696	Hspa8 Tubb4a Ikbkg Nfkb2 Nfkbie Rela Nfkb1 Ikbkb Relb Map3k8 Nfkbia Cltc Rel	GO:0014013_regulation of gliogenesis_0.0133335265327364 GO:0032088_negative regulation of NF-kappaB transcription factor activity_0.00306224369445179 GO:0008544_epidermis development_0.0287440034682816 GO:0051092_positive regulation of NF-kappaB transcription factor activity_5.47288592943199e-05 GO:0051084_'de novo' posttranslational protein folding_0.00573460385862929 GO:0001889_liver developmen…
K=7_2	2	0.307692	13627 15481 217737 331026 15516 22218 72354 19060 21770 74006 20867 14677 67738	Eef1a1 Hspa8 Ahsa1 Gmppb Hsp90ab1 Sumo1 Ttc4 Ppp5c Ppp2r5d Dnm1l Stip1 Gnai1 Ppid	GO:0051291_protein heterooligomerization_0.0298628296781523 GO:0051084_'de novo' posttranslational protein folding_0.00573460385862929 GO:0014070_response to organic cyclic compound_0.0261287755196164 GO:0043279_response to alkaloid_0.0144687299050763 GO:0031645_negative regulation of neurological system process_0.0125760538492648 GO:0051970_negative regulation of transmission of nerve impulse_0.…
K=5_6	1	0.285714	15481 69719 21374 319178 18519 226432 53605	Hspa8 Cad Tbp Hist1h2bb Kat2b Ipo9 Nap1l1	GO:0006606_protein import into nucleus_0.00617517996284111 GO:0051084_'de novo' posttranslational protein folding_0.00309168830774057 GO:0046777_protein autophosphorylation_0.0163945198073527 GO:0006367_transcription initiation from RNA polymerase II promoter_0.00288583096145172 GO:0006366_transcription from RNA polymerase II promoter_0.00986457587406338 GO:0022613_ribonucleoprotein complex bioge…
K=6_0	1	0.285714	13627 15481 20174 109275 56249 68142 70047	Eef1a1 Hspa8 Ruvbl2 Actr5 Actr8 Ino80 Trnt1	GO:0051084_'de novo' posttranslational protein folding_0.00309168830774057 GO:0042446_hormone biosynthetic process_0.00484014649115616 GO:0008033_tRNA processing_0.0141540278479054
K=6_7	1	0.285714	13627 15481 331026 69719 17916 52163 17218	Eef1a1 Hspa8 Gmppb Cad Myo1f Camk1 Mcm5	GO:0051084_'de novo' posttranslational protein folding_0.00309168830774057 GO:0046777_protein autophosphorylation_0.0163945198073527 GO:0042446_hormone biosynthetic process_0.000125990670767629 GO:0002443_leukocyte mediated immunity_0.0086360838727731 GO:0007162_negative regulation of cell adhesion_0.00638045508058263 GO:0050830_defense response to Gram-positive bacterium_0.00617517996284111 GO:0…
K=6_9	1	0.285714	15481 12785 57741 69663 12607 18572 67619	Hspa8 Cnbp Ddx51 Cebpz Pdcd11 Nob1	GO:0051084_'de novo' posttranslational protein folding_0.00265056542283589 GO:0022613_ribonucleoprotein complex biogenesis_4.14358836871103e-05 GO:0043123_positive regulation of I-kappaB kinase/NF-kappaB cascade_0.0045905902578069 GO:0006364_rRNA processing_1.82557836894458e-07
K=6_5	1	0.285714	13627 15481 331026 11966 22218 107182 218832	Eef1a1 Hspa8 Gmppb Atp6v1b2 Sumo1 Btaf1 Polr3a	GO:0051084_'de novo' posttranslational protein folding_0.00309168830774057 GO:0006754_ATP biosynthetic process_0.0155803009750777 GO:0034220_ion transmembrane transport_0.00822629631835399 GO:0015992_proton transport_0.0108873222129038
K=6_9	1	0.285714	22153 234374 68738 231659 22145 67834 20174	Tubb4a Ddx49 Acss1 Gcn1l1 Tuba4a Idh3a Ruvbl2	GO:0043648_dicarboxylic acid metabolic process_0.00761134275757512 GO:0042446_hormone biosynthetic process_0.00484014649115616 GO:0009108_coenzyme biosynthetic process_0.0137461960570672 GO:0006084_acetyl-CoA metabolic process_2.98194284230347e-05 GO:0006767_water-soluble vitamin metabolic process_0.0129300986203412 GO:0007018_microtubule-based movement_0.0180212258932484 GO:0051187_cofactor cata…
K=6_0	1	0.285714	13627 15481 69719 16785 75751 78920 83945	Eef1a1 Hspa8 Cad Rpsa Ipo4 Dlst Dnaja3	GO:0032088_negative regulation of NF-kappaB transcription factor activity_0.00164992156211657 GO:0006606_protein import into nucleus_0.00617517996284111 GO:0051084_'de novo' posttranslational protein folding_0.00309168830774057 GO:0046777_protein autophosphorylation_0.0163945198073527 GO:0043648_dicarboxylic acid metabolic process_0.00761134275757512 GO:0042102_positive regulation of T cell proli…
K=7_1	1	0.285714	15481 19047 66899 94230 54188 68991 56522	Hspa8 Ppp1cc Fip1l1 Cpsf1 Cpsf4 Ssu72 Papolb	GO:0051084_'de novo' posttranslational protein folding_0.00309168830774057 GO:0005977_glycogen metabolic process_0.00720119216844698
K=7_5	1	0.285714	15481 12785 57741 69663 12607 18572 67619	Hspa8 Cnbp Ddx51 Cebpz Pdcd11 Nob1	GO:0051084_'de novo' posttranslational protein folding_0.00265056542283589 GO:0022613_ribonucleoprotein complex biogenesis_4.14358836871103e-05 GO:0043123_positive regulation of I-kappaB kinase/NF-kappaB cascade_0.0045905902578069 GO:0006364_rRNA processing_1.82557836894458e-07
K=7_6	1	0.285714	15481 192159 54614 320632 110750 68988 72886	Hspa8 Prpf8 Prpf40b Snrnp200 Cse1l Prpf31 Ccdc94	GO:0051084_'de novo' posttranslational protein folding_0.00309168830774057 GO:0000398_nuclear mRNA splicing, via spliceosome_6.23190537736558e-06 GO:0042446_hormone biosynthetic process_0.00484014649115616 GO:0022618_ribonucleoprotein complex assembly_0.00555913649395077
K=7_0	1	0.285714	107476 13627 15481 331026 68738 72322 52163	Acaca Eef1a1 Hspa8 Gmppb Acss1 Xpo5 Camk1	GO:0031047_gene silencing by RNA_0.00596986849606446 GO:0051084_'de novo' posttranslational protein folding_0.00309168830774057 GO:0042446_hormone biosynthetic process_0.00484014649115616 GO:0014070_response to organic cyclic compound_0.0141540278479054 GO:0009108_coenzyme biosynthetic process_0.0137461960570672 GO:0006084_acetyl-CoA metabolic process_2.98194284230347e-05 GO:0007399_nervous syste…
K=7_1	1	0.285714	13627 54401 20528 13382 56451 67834 78920	Eef1a1 Ywhab Slc2a4 Dld Suclg1 Idh3a Dlst	GO:0042593_glucose homeostasis_0.00965991786990341 GO:0051291_protein heterooligomerization_0.0161910192351074 GO:0043648_dicarboxylic acid metabolic process_4.18175068484744e-11 GO:0007369_gastrulation_0.0102737831299386 GO:0015758_glucose transport_0.00617517996284111 GO:0045454_cell redox homeostasis_0.0121134224253377 GO:0009108_coenzyme biosynthetic process_0.0137461960570672 GO:0006084_acet…
K=7_2	1	0.285714	13627 11966 54401 20528 78920 11461 11740	Eef1a1 Atp6v1b2 Ywhab Slc2a4 Dlst Actb Slc25a5	GO:0042593_glucose homeostasis_0.00965991786990341 GO:0051291_protein heterooligomerization_0.0161910192351074 GO:0043648_dicarboxylic acid metabolic process_0.00761134275757512 GO:0015758_glucose transport_0.00617517996284111 GO:0006754_ATP biosynthetic process_0.0155803009750777 GO:0006084_acetyl-CoA metabolic process_0.00843120824060227 GO:0034220_ion transmembrane transport_0.0082262963183539…
K=9_1	2	0.285714	13627 15481 107094 21771 110816 13204 18572 20102 208144 217995 230082 53414 55989 75416	Eef1a1 Hspa8 Rrp12 Cirh1a Pwp2 Dhx15 Pdcd11 Rps4x Dhx37 Heatr1 Nol6 Bysl Nop58 Nop14	GO:0006606_protein import into nucleus_0.0123134905799124 GO:0051084_'de novo' posttranslational protein folding_0.00617445347499525 GO:0042446_hormone biosynthetic process_0.00120780505477041 GO:0022613_ribonucleoprotein complex biogenesis_1.61618686363276e-06 GO:0043123_positive regulation of I-kappaB kinase/NF-kappaB cascade_0.0106798663378299 GO:0006364_rRNA processing_0.000397707677559878
K=6_0	3	0.26087	15481 22153 69719 54401 15516 16151 22631 18034 18037 20174 26406 53859 19697 18033 15519 11461 16150 19698 26410 18035 67300 19696 213539	Hspa8 Tubb4a Cad Ywhab Hsp90ab1 Ikbkg Ywhaz Nfkb2 Nfkbie Ruvbl2 Map3k3 Map3k14 Rela Nfkb1 Hsp90aa1 Actb Ikbkb Relb Map3k8 Nfkbia Cltc Rel Bag2	GO:0014013_regulation of gliogenesis_0.0234724062817596 GO:0032088_negative regulation of NF-kappaB transcription factor activity_0.00541222924104951 GO:0051092_positive regulation of NF-kappaB transcription factor activity_0.000176578784927767 GO:0051084_'de novo' posttranslational protein folding_0.0101249356235576 GO:0001889_liver development_0.0327130182521205 GO:0046777_protein autophosphory…
K=4_6	1	0.25	26413 22059 18753 51792 19052 71978 12450 26931	Mapk1 Trp53 Prkcd Ppp2r1a Ppp2ca Ppp2r2a Ccng1 Ppp2r5c	GO:0035282_segmentation_0.0112660001172163 GO:0046324_regulation of glucose import_0.00494262027836742 GO:0007059_chromosome segregation_0.00939608218652448 GO:0030163_protein catabolic process_0.0396297314945459 GO:0006885_regulation of pH_0.00658540332818142 GO:0001756_somitogenesis_0.0103314275840719 GO:0042493_response to drug_0.0210324875501549 GO:0030217_T cell differentiation_0.01266641099…
K=5_2	1	0.25	15481 331026 69719 327655 226432 56637 20104 53605	Hspa8 Gmppb Cad Ppip5k1 Ipo9 Gsk3b Rps6 Nap1l1	GO:0042593_glucose homeostasis_0.0110324294100241 GO:0006606_protein import into nucleus_0.00705433381537892 GO:0031345_negative regulation of cell projection organization_0.00799161377112005 GO:0051084_'de novo' posttranslational protein folding_0.00353262908783623 GO:0046777_protein autophosphorylation_0.0187148228892213 GO:0007369_gastrulation_0.011732996730726 GO:0070925_organelle assembly_0.…
K=6_5	1	0.25	15481 74737 19047 66899 94230 54188 68991 56522	Hspa8 Pcf11 Ppp1cc Fip1l1 Cpsf1 Cpsf4 Ssu72 Papolb	GO:0051084_'de novo' posttranslational protein folding_0.00353262908783623 GO:0005977_glycogen metabolic process_0.00822581276450467
K=6_7	1	0.25	100019 13627 15481 18194 233726 331026 52432 69719	Mdn1 Eef1a1 Hspa8 Nsdhl Ipo7 Gmppb Ppp2r2d Cad	GO:0008544_epidermis development_0.0177864135904728 GO:0006606_protein import into nucleus_0.00705433381537892 GO:0051084_'de novo' posttranslational protein folding_0.00353262908783623 GO:0001568_blood vessel development_0.0159272889660983 GO:0046777_protein autophosphorylation_0.0187148228892213 GO:0022405_hair cycle process_0.012199800333401 GO:0006695_cholesterol biosynthetic process_0.005881…
K=6_2	2	0.25	15481 16151 21938 26406 53859 18033 15519 11461 11740 192656 19766 21937 22029 22030 56532 15502	Hspa8 Ikbkg Tnfrsf1b Map3k3 Map3k14 Nfkb1 Hsp90aa1 Actb Slc25a5 Ripk2 Ripk1 Tnfrsf1a Traf1 Traf2 Ripk3 Dnaja1	GO:0032680_regulation of tumor necrosis factor production_0.014060551471683 GO:0070555_response to interleukin-1_0.00141446862852794 GO:0051291_protein heterooligomerization_6.661625043146e-06 GO:0051092_positive regulation of NF-kappaB transcription factor activity_8.40643375179846e-05 GO:0043487_regulation of RNA stability_0.00752218608024276 GO:0051084_'de novo' posttranslational protein foldi…
K=7_3	1	0.25	15481 20016 218832 68877 66136 229776 70428 20019	Hspa8 Polr1c Polr3a Maf1 Znrd1 Cdc14a Polr3b Polr1a	GO:0051084_'de novo' posttranslational protein folding_0.00353262908783623 GO:0045087_innate immune response_0.0277266513614273 GO:0009615_response to virus_0.0170896023221003
K=7_1	1	0.25	13627 15481 331026 11966 17217 17219 17218 12544	Eef1a1 Hspa8 Gmppb Atp6v1b2 Mcm4 Mcm6 Mcm5 Cdc45	GO:0051084_'de novo' posttranslational protein folding_0.00353262908783623 GO:0042446_hormone biosynthetic process_3.89589308430411e-06 GO:0051301_cell division_0.00203894293924182 GO:0071103_DNA conformation change_2.56056066938563e-05 GO:0006754_ATP biosynthetic process_0.0177864135904728 GO:0034220_ion transmembrane transport_0.00939608218652448 GO:0015992_proton transport_0.0124331297770449
K=7_5	1	0.25	13627 15481 331026 21762 15357 19181 13871 19361	Eef1a1 Hspa8 Gmppb Psmd2 Hmgcr Psmc2 Ercc2 Rad51	GO:0008544_epidermis development_0.0177864135904728 GO:0051084_'de novo' posttranslational protein folding_0.00353262908783623 GO:0042446_hormone biosynthetic process_0.00638711280908234 GO:0001701_in utero embryonic development_0.0448537514831796 GO:0022405_hair cycle process_0.012199800333401 GO:0006695_cholesterol biosynthetic process_0.00588164426778965 GO:0000724_double-strand break repair v…
K=8_1	1	0.25	15481 20016 218832 68877 66136 229776 70428 20019	Hspa8 Polr1c Polr3a Maf1 Znrd1 Cdc14a Polr3b Polr1a	GO:0051084_'de novo' posttranslational protein folding_0.00353262908783623 GO:0045087_innate immune response_0.0277266513614273 GO:0009615_response to virus_0.0170896023221003
K=8_6	1	0.25	15481 192159 218298 320632 13204 72886 53317 66877	Hspa8 Prpf8 Snrnp200 Dhx15 Ccdc94 Plrg1 Crnkl1	GO:0051084_'de novo' posttranslational protein folding_0.00309168830774057 GO:0000398_nuclear mRNA splicing, via spliceosome_6.23190537736558e-06 GO:0042446_hormone biosynthetic process_0.000125990670767629
K=8_0	1	0.25	107476 13627 15481 217737 331026 21762 19181 51797	Acaca Eef1a1 Hspa8 Ahsa1 Gmppb Psmd2 Psmc2 Ctps	GO:0051084_'de novo' posttranslational protein folding_0.00353262908783623 GO:0009064_glutamine family amino acid metabolic process_0.00939608218652448 GO:0042446_hormone biosynthetic process_0.00638711280908234 GO:0014070_response to organic cyclic compound_0.0161598478012712 GO:0006084_acetyl-CoA metabolic process_0.00962999102189957 GO:0030163_protein catabolic process_0.0396297314945459 GO:00…
K=5_2	1	0.222222	15481 11966 21374 232791 231464 245860 234594 69125 72068	Hspa8 Atp6v1b2 Tbp Cnot3 Cnot6l Atg9a Cnot1 Cnot8 Cnot2	GO:0006914_autophagy_0.00898619637113721 GO:0006754_ATP biosynthetic process_0.0199876471528438 GO:0034220_ion transmembrane transport_0.0105645227595529 GO:0051084_'de novo' posttranslational protein folding_0.00397338783293184 GO:0006383_transcription from RNA polymerase III promoter_0.000530597797638881 GO:0070925_organelle assembly_0.0081961942614679 GO:0006367_transcription initiation from R…
K=6_6	1	0.222222	13627 15481 331026 11966 17686 17685 17688 17350 327762	Eef1a1 Hspa8 Gmppb Atp6v1b2 Msh3 Msh2 Msh6 Mlh1 Dna2	GO:0007059_chromosome segregation_0.0105645227595529 GO:0051084_'de novo' posttranslational protein folding_0.00397338783293184 GO:0008630_DNA damage response, signal transduction resulting in induction of apoptosis_1.31074276586997e-05 GO:0000077_DNA damage checkpoint_0.00503058495883764 GO:0031124_mRNA 3'-end processing_0.00317983484287188 GO:0007292_female gamete generation_0.00608678452317548…
K=7_0	1	0.222222	15481 16650 109075 213550 227715 27998 66362 66583 675032	Hspa8 Kpna6 Exosc4 Dis3l Exosc2 Exosc5 Exosc3 Exosc1	GO:0006606_protein import into nucleus_0.00705433381537892 GO:0051084_'de novo' posttranslational protein folding_0.00353262908783623 GO:0006364_rRNA processing_2.08418908193388e-12
K=8_0	1	0.222222	15481 16650 109075 213550 227715 27998 66362 66583 675032	Hspa8 Kpna6 Exosc4 Dis3l Exosc2 Exosc5 Exosc3 Exosc1	GO:0006606_protein import into nucleus_0.00705433381537892 GO:0051084_'de novo' posttranslational protein folding_0.00353262908783623 GO:0006364_rRNA processing_2.08418908193388e-12
K=8_1	1	0.222222	107476 13627 15481 217737 331026 231659 11966 103573 19181	Acaca Eef1a1 Hspa8 Ahsa1 Gmppb Gcn1l1 Atp6v1b2 Xpo1 Psmc2	GO:0051084_'de novo' posttranslational protein folding_0.00397338783293184 GO:0042446_hormone biosynthetic process_0.00812759980143113 GO:0033365_protein localization to organelle_0.00265048734875532 GO:0014070_response to organic cyclic compound_0.0181616457047187 GO:0006754_ATP biosynthetic process_0.0199876471528438 GO:0006084_acetyl-CoA metabolic process_0.0108273598107679 GO:0030163_protein …
K=8_4	2	0.210526	13627 15481 11966 107094 20068 21771 110816 13204 18572 20102 208144 217995 230082 245474 53414 544817 55989 624124 75416	Eef1a1 Hspa8 Atp6v1b2 Rrp12 Rps17 Cirh1a Pwp2 Dhx15 Pdcd11 Rps4x Dhx37 Heatr1 Nol6 Dkc1 Bysl Arhgap27 Nop58 Nop14	GO:0009451_RNA modification_0.017372045817755 GO:0006606_protein import into nucleus_0.0158046249226 GO:0051084_'de novo' posttranslational protein folding_0.00793203647005246 GO:0042446_hormone biosynthetic process_0.00258499150678544 GO:0022613_ribonucleoprotein complex biogenesis_3.60583807471386e-06 GO:0006412_translation_0.00801592973529404 GO:0043123_positive regulation of I-kappaB kinase/N…
K=6_4	1	0.2	15481 16650 109075 213550 227715 27998 66362 66583 675032 72198	Hspa8 Kpna6 Exosc4 Dis3l Exosc2 Exosc5 Exosc3 Exosc1 Skiv2l2	GO:0006606_protein import into nucleus_0.00793273585552809 GO:0051084_'de novo' posttranslational protein folding_0.00397338783293184 GO:0042446_hormone biosynthetic process_0.00812759980143113 GO:0006364_rRNA processing_4.68170586849561e-12
K=6_2	1	0.2	13627 15481 331026 69719 11966 17217 18393 17219 17218 12544	Eef1a1 Hspa8 Gmppb Cad Atp6v1b2 Mcm4 Orc2 Mcm6 Mcm5 Cdc45	GO:0051084_'de novo' posttranslational protein folding_0.0044139646128117 GO:0046777_protein autophosphorylation_0.0233392256380634 GO:0042446_hormone biosynthetic process_1.14006459626818e-05 GO:0051301_cell division_0.00323941016797323 GO:0071103_DNA conformation change_4.1101752111337e-05 GO:0006754_ATP biosynthetic process_0.022184012309176 GO:0034220_ion transmembrane transport_0.01173161954…
K=7_0	1	0.2	15481 192159 54614 218298 320632 13204 433702 72886 53317 66877	Hspa8 Prpf8 Prpf40b Snrnp200 Dhx15 Ncbp1 Ccdc94 Plrg1 Crnkl1	GO:0031047_gene silencing by RNA_0.00766921524348334 GO:0051084_'de novo' posttranslational protein folding_0.00397338783293184 GO:0000398_nuclear mRNA splicing, via spliceosome_1.06761289306141e-05 GO:0042446_hormone biosynthetic process_0.000295408335861594 GO:0009452_RNA capping_0.00132602527534079
K=8_3	1	0.2	15481 69237 666669 57741 12607 52874 16418 57750 67459 67848	Hspa8 Gtpbp4 Cebpz D19Bwg1357e Eif6 Wdr12 Nvl Ddx55	GO:0051084_'de novo' posttranslational protein folding_0.00353262908783623 GO:0007229_integrin-mediated signaling pathway_0.0161598478012712 GO:0070925_organelle assembly_0.00728872641878632 GO:0042446_hormone biosynthetic process_0.00638711280908234 GO:0022613_ribonucleoprotein complex biogenesis_7.71799282613523e-05 GO:0022618_ribonucleoprotein complex assembly_0.00635086542724075 GO:0006364_rR…
K=9_0	1	0.2	15481 192159 320632 68988 67207 27366 67678 50783 66094 78651	Hspa8 Prpf8 Snrnp200 Prpf31 Lsm1 Txnl4a Lsm3 Lsm4 Lsm7 Lsm6	GO:0051084_'de novo' posttranslational protein folding_0.0044139646128117 GO:0000398_nuclear mRNA splicing, via spliceosome_1.78341073029467e-08 GO:0042446_hormone biosynthetic process_0.0100552182724772 GO:0008033_tRNA processing_0.0201594295048536 GO:0022618_ribonucleoprotein complex assembly_0.0079325027087453 GO:0006364_rRNA processing_0.0210275693578342
K=10_0	1	0.2	15481 192159 320632 68988 67207 27366 67678 50783 66094 78651	Hspa8 Prpf8 Snrnp200 Prpf31 Lsm1 Txnl4a Lsm3 Lsm4 Lsm7 Lsm6	GO:0051084_'de novo' posttranslational protein folding_0.0044139646128117 GO:0000398_nuclear mRNA splicing, via spliceosome_1.78341073029467e-08 GO:0042446_hormone biosynthetic process_0.0100552182724772 GO:0008033_tRNA processing_0.0201594295048536 GO:0022618_ribonucleoprotein complex assembly_0.0079325027087453 GO:0006364_rRNA processing_0.0210275693578342
K=5_4	1	0.181818	15481 69719 20174 19697 107182 21374 226182 270627 18519 234594 12892	Hspa8 Cad Ruvbl2 Rela Btaf1 Tbp Taf5 Taf1 Kat2b Cnot1 Cpox	GO:0014013_regulation of gliogenesis_0.0112935148738412 GO:0008544_epidermis development_0.0243755196835347 GO:0051099_positive regulation of binding_0.018970491600376 GO:0051092_positive regulation of NF-kappaB transcription factor activity_0.00936575687959499 GO:0051084_'de novo' posttranslational protein folding_0.00485435949723541 GO:0001889_liver development_0.015778361428362 GO:0006383_tran…
K=5_9	1	0.181818	13627 15481 11966 103468 110379 12411 69162 56334 20334 77371 74498	Eef1a1 Hspa8 Atp6v1b2 Nup107 Sec13 Cbs Sec31a Tmed2 Sec23a Sec24a Gorasp1	GO:0051084_'de novo' posttranslational protein folding_0.00485435949723541 GO:0044272_sulfur compound biosynthetic process_0.0116144761055481 GO:0006754_ATP biosynthetic process_0.0243755196835347 GO:0034220_ion transmembrane transport_0.0128973740485837 GO:0015992_proton transport_0.0170563448562186 GO:0001503_ossification_0.0250096222568687 GO:0008652_cellular amino acid biosynthetic process_0.…
K=6_4	1	0.181818	13627 15481 11966 20016 22218 218832 68877 66136 229776 70428 20019	Eef1a1 Hspa8 Atp6v1b2 Polr1c Sumo1 Polr3a Maf1 Znrd1 Cdc14a Polr3b Polr1a	GO:0051084_'de novo' posttranslational protein folding_0.00485435949723541 GO:0045087_innate immune response_0.0379264380526687 GO:0006754_ATP biosynthetic process_0.0243755196835347 GO:0034220_ion transmembrane transport_0.0128973740485837 GO:0009615_response to virus_0.0234236628481449 GO:0015992_proton transport_0.0170563448562186 GO:0043687_post-translational protein modification_0.0382203801…
K=8_2	1	0.181818	15481 192159 320632 24127 68988 67207 27366 67678 50783 66094 78651	Hspa8 Prpf8 Snrnp200 Xrn1 Prpf31 Lsm1 Txnl4a Lsm3 Lsm4 Lsm7 Lsm6	GO:0051084_'de novo' posttranslational protein folding_0.00485435949723541 GO:0000398_nuclear mRNA splicing, via spliceosome_2.45132215758857e-08 GO:0042446_hormone biosynthetic process_0.0121637305900148 GO:0008033_tRNA processing_0.0221532071328148 GO:0022618_ribonucleoprotein complex assembly_0.00872241195164898 GO:0006364_rRNA processing_0.0231061896765082 GO:0007569_cell aging_0.008400597074…
K=9_6	1	0.181818	666669 19989 668144 67891 20102 624124 27050 629116 21770 51792 20104	Rpl7 Gm9000 Rpl4 Rps4x Rps3 Ppp2r5d Ppp2r1a Rps6	GO:0042593_glucose homeostasis_0.0110324294100241 GO:0007059_chromosome segregation_0.00939608218652448 GO:0007369_gastrulation_0.011732996730726 GO:0070925_organelle assembly_0.00728872641878632 GO:0022613_ribonucleoprotein complex biogenesis_0.0133659653663796 GO:0006412_translation_1.294531870204e-09 GO:0030217_T cell differentiation_0.012666410993621 GO:0007067_mitosis_0.043720215043314 GO:00…
K=7_4	1	0.166667	15481 192159 320632 24127 68988 67207 27366 67678 50783 66877 66094 78651	Hspa8 Prpf8 Snrnp200 Xrn1 Prpf31 Lsm1 Txnl4a Lsm3 Lsm4 Crnkl1 Lsm7 Lsm6	GO:0051084_'de novo' posttranslational protein folding_0.00529457255593786 GO:0000398_nuclear mRNA splicing, via spliceosome_3.46915830622643e-11 GO:0042446_hormone biosynthetic process_0.0144470475265935 GO:0008033_tRNA processing_0.0241429865043043 GO:0022618_ribonucleoprotein complex assembly_0.00951171552525203 GO:0006364_rRNA processing_0.0251804576980745 GO:0007569_cell aging_0.009160913936…
K=6_8	1	0.153846	15481 192159 70640 320632 24127 68988 67207 27366 67678 50783 66877 66094 78651	Hspa8 Prpf8 Dcp2 Snrnp200 Xrn1 Prpf31 Lsm1 Txnl4a Lsm3 Lsm4 Crnkl1 Lsm7 Lsm6	GO:0051084_'de novo' posttranslational protein folding_0.00573460385862929 GO:0000398_nuclear mRNA splicing, via spliceosome_5.00923333231732e-11 GO:0042446_hormone biosynthetic process_0.0168992251621184 GO:0008033_tRNA processing_0.0261287755196164 GO:0022618_ribonucleoprotein complex assembly_0.0103004138761078 GO:0006364_rRNA processing_0.0272503824074569 GO:0007569_cell aging_0.0099206702256…
K=6_1	1	0.142857	15481 192159 54614 218298 320632 13204 433702 110750 68988 72886 53317 66810 66877 193116	Hspa8 Prpf8 Prpf40b Snrnp200 Dhx15 Ncbp1 Cse1l Prpf31 Ccdc94 Plrg1 Rbm22 Crnkl1 Slu7	GO:0031047_gene silencing by RNA_0.011059497869688 GO:0051084_'de novo' posttranslational protein folding_0.00573460385862929 GO:0000398_nuclear mRNA splicing, via spliceosome_4.24595233455446e-08 GO:0042446_hormone biosynthetic process_0.000960070531206224 GO:0009452_RNA capping_0.00191491813064806 GO:0022618_ribonucleoprotein complex assembly_0.0103004138761078
K=6_4	1	0.133333	15481 53356 68969 668144 20068 56347 20102 624124 13669 27979 24015 245860 66810 13001 217869	Hspa8 Eif3g Eif1b Gm9000 Rps17 Eif3c Rps4x Eif3a Eif3b Abce1 Atg9a Rbm22 Csnk2b Eif5	GO:0051084_'de novo' posttranslational protein folding_0.00617445347499525 GO:0070925_organelle assembly_0.0127215050718534 GO:0042446_hormone biosynthetic process_0.0195144618466764 GO:0006412_translation_2.72410239090104e-14 GO:0006914_autophagy_0.0139446096702246 GO:0006413_translational initiation_6.32179370831847e-13 GO:0022618_ribonucleoprotein complex assembly_0.0110885074504537 GO:0007033…
K=9_2	1	0.125	13382 104776 16828 18293 20916 229211 24067 264895 56284 56451 66052 66242 66945 67680 67834 78920	Dld Aldh6a1 Ldha Ogdh Sucla2 Acad9 Srp54a Acsf2 Mrpl19 Suclg1 Sdhc Mrps16 Sdha Sdhb Idh3a Dlst	GO:0009063_cellular amino acid catabolic process_0.0256358742694123 GO:0006612_protein targeting to membrane_0.0103293044615058 GO:0043648_dicarboxylic acid metabolic process_1.13722454869688e-20 GO:0007369_gastrulation_0.0233310518169236 GO:0006096_glycolysis_0.000186251974908005 GO:0045454_cell redox homeostasis_0.0274760597868269 GO:0006412_translation_0.00634968845778389 GO:0009108_coenzyme b…
K=10_1	1	0.125	13382 104776 16828 18293 20916 229211 24067 264895 56284 56451 66052 66242 66945 67680 67834 78920	Dld Aldh6a1 Ldha Ogdh Sucla2 Acad9 Srp54a Acsf2 Mrpl19 Suclg1 Sdhc Mrps16 Sdha Sdhb Idh3a Dlst	GO:0009063_cellular amino acid catabolic process_0.0256358742694123 GO:0006612_protein targeting to membrane_0.0103293044615058 GO:0043648_dicarboxylic acid metabolic process_1.13722454869688e-20 GO:0007369_gastrulation_0.0233310518169236 GO:0006096_glycolysis_0.000186251974908005 GO:0045454_cell redox homeostasis_0.0274760597868269 GO:0006412_translation_0.00634968845778389 GO:0009108_coenzyme b…
K=11_0	1	0.125	13382 104776 16828 18293 20916 229211 24067 264895 56284 56451 66052 66242 66945 67680 67834 78920	Dld Aldh6a1 Ldha Ogdh Sucla2 Acad9 Srp54a Acsf2 Mrpl19 Suclg1 Sdhc Mrps16 Sdha Sdhb Idh3a Dlst	GO:0009063_cellular amino acid catabolic process_0.0256358742694123 GO:0006612_protein targeting to membrane_0.0103293044615058 GO:0043648_dicarboxylic acid metabolic process_1.13722454869688e-20 GO:0007369_gastrulation_0.0233310518169236 GO:0006096_glycolysis_0.000186251974908005 GO:0045454_cell redox homeostasis_0.0274760597868269 GO:0006412_translation_0.00634968845778389 GO:0009108_coenzyme b…
K=12_0	1	0.125	13382 104776 16828 18293 20916 229211 24067 264895 56284 56451 66052 66242 66945 67680 67834 78920	Dld Aldh6a1 Ldha Ogdh Sucla2 Acad9 Srp54a Acsf2 Mrpl19 Suclg1 Sdhc Mrps16 Sdha Sdhb Idh3a Dlst	GO:0009063_cellular amino acid catabolic process_0.0256358742694123 GO:0006612_protein targeting to membrane_0.0103293044615058 GO:0043648_dicarboxylic acid metabolic process_1.13722454869688e-20 GO:0007369_gastrulation_0.0233310518169236 GO:0006096_glycolysis_0.000186251974908005 GO:0045454_cell redox homeostasis_0.0274760597868269 GO:0006412_translation_0.00634968845778389 GO:0009108_coenzyme b…
K=13_0	1	0.125	13382 104776 16828 18293 20916 229211 24067 264895 56284 56451 66052 66242 66945 67680 67834 78920	Dld Aldh6a1 Ldha Ogdh Sucla2 Acad9 Srp54a Acsf2 Mrpl19 Suclg1 Sdhc Mrps16 Sdha Sdhb Idh3a Dlst	GO:0009063_cellular amino acid catabolic process_0.0256358742694123 GO:0006612_protein targeting to membrane_0.0103293044615058 GO:0043648_dicarboxylic acid metabolic process_1.13722454869688e-20 GO:0007369_gastrulation_0.0233310518169236 GO:0006096_glycolysis_0.000186251974908005 GO:0045454_cell redox homeostasis_0.0274760597868269 GO:0006412_translation_0.00634968845778389 GO:0009108_coenzyme b…
K=14_0	1	0.125	13382 104776 16828 18293 20916 229211 24067 264895 56284 56451 66052 66242 66945 67680 67834 78920	Dld Aldh6a1 Ldha Ogdh Sucla2 Acad9 Srp54a Acsf2 Mrpl19 Suclg1 Sdhc Mrps16 Sdha Sdhb Idh3a Dlst	GO:0009063_cellular amino acid catabolic process_0.0256358742694123 GO:0006612_protein targeting to membrane_0.0103293044615058 GO:0043648_dicarboxylic acid metabolic process_1.13722454869688e-20 GO:0007369_gastrulation_0.0233310518169236 GO:0006096_glycolysis_0.000186251974908005 GO:0045454_cell redox homeostasis_0.0274760597868269 GO:0006412_translation_0.00634968845778389 GO:0009108_coenzyme b…
K=15_0	1	0.125	13382 104776 16828 18293 20916 229211 24067 264895 56284 56451 66052 66242 66945 67680 67834 78920	Dld Aldh6a1 Ldha Ogdh Sucla2 Acad9 Srp54a Acsf2 Mrpl19 Suclg1 Sdhc Mrps16 Sdha Sdhb Idh3a Dlst	GO:0009063_cellular amino acid catabolic process_0.0256358742694123 GO:0006612_protein targeting to membrane_0.0103293044615058 GO:0043648_dicarboxylic acid metabolic process_1.13722454869688e-20 GO:0007369_gastrulation_0.0233310518169236 GO:0006096_glycolysis_0.000186251974908005 GO:0045454_cell redox homeostasis_0.0274760597868269 GO:0006412_translation_0.00634968845778389 GO:0009108_coenzyme b…
K=16_0	1	0.125	13382 104776 16828 18293 20916 229211 24067 264895 56284 56451 66052 66242 66945 67680 67834 78920	Dld Aldh6a1 Ldha Ogdh Sucla2 Acad9 Srp54a Acsf2 Mrpl19 Suclg1 Sdhc Mrps16 Sdha Sdhb Idh3a Dlst	GO:0009063_cellular amino acid catabolic process_0.0256358742694123 GO:0006612_protein targeting to membrane_0.0103293044615058 GO:0043648_dicarboxylic acid metabolic process_1.13722454869688e-20 GO:0007369_gastrulation_0.0233310518169236 GO:0006096_glycolysis_0.000186251974908005 GO:0045454_cell redox homeostasis_0.0274760597868269 GO:0006412_translation_0.00634968845778389 GO:0009108_coenzyme b…
K=8_5	1	0.117647	20528 13382 104776 16828 18293 20916 229211 24067 264895 56284 56451 66052 66242 66945 67680 67834 78920	Slc2a4 Dld Aldh6a1 Ldha Ogdh Sucla2 Acad9 Srp54a Acsf2 Mrpl19 Suclg1 Sdhc Mrps16 Sdha Sdhb Idh3a Dlst	GO:0042593_glucose homeostasis_0.0233015504934049 GO:0009063_cellular amino acid catabolic process_0.0272165145158488 GO:0006612_protein targeting to membrane_0.0109714928552602 GO:0043648_dicarboxylic acid metabolic process_2.14645774775868e-20 GO:0007369_gastrulation_0.0247713965375806 GO:0006096_glycolysis_0.000210915652911013 GO:0015758_glucose transport_0.0149329613187762 GO:0045454_cell red…
K=8_8	1	0.117647	666669 20528 18293 19989 668144 67891 110816 20102 245474 624124 27050 629116 21770 51792 18103 20104 67115	Slc2a4 Ogdh Rpl7 Gm9000 Rpl4 Pwp2 Rps4x Dkc1 Rps3 Ppp2r5d Ppp2r1a Gm20390 Rps6 Rpl14	GO:0042593_glucose homeostasis_0.000169195527635721 GO:0009451_RNA modification_0.0135370645615948 GO:0007059_chromosome segregation_0.0163865989029245 GO:0043648_dicarboxylic acid metabolic process_0.015166307115749 GO:0007369_gastrulation_0.0204441053755893 GO:0070925_organelle assembly_0.0127215050718534 GO:0022613_ribonucleoprotein complex biogenesis_0.0232751063622941 GO:0006096_glycolysis_0…
K=15_1	1	0.117647	20528 19053 26445 19172 19173 19175 19177 26440 26441 26442 26444 26446 26443 51792 19166 19170 19167	Slc2a4 Ppp2cb Psmb2 Psmb4 Psmb5 Psmb6 Psmb7 Psma1 Psma4 Psma5 Psma7 Psmb3 Psma6 Ppp2r1a Psma2 Psmb1 Psma3	GO:0042593_glucose homeostasis_0.0233015504934049 GO:0007059_chromosome segregation_0.0198637972750343 GO:0015758_glucose transport_0.0149329613187762 GO:0030163_protein catabolic process_2.48134253952479e-33 GO:0050728_negative regulation of inflammatory response_0.000123690094873362 GO:0042542_response to hydrogen peroxide_0.0174012903183276 GO:0050777_negative regulation of immune response_0.0…
K=16_1	1	0.117647	20528 19053 26445 19172 19173 19175 19177 26440 26441 26442 26444 26446 26443 51792 19166 19170 19167	Slc2a4 Ppp2cb Psmb2 Psmb4 Psmb5 Psmb6 Psmb7 Psma1 Psma4 Psma5 Psma7 Psmb3 Psma6 Ppp2r1a Psma2 Psmb1 Psma3	GO:0042593_glucose homeostasis_0.0233015504934049 GO:0007059_chromosome segregation_0.0198637972750343 GO:0015758_glucose transport_0.0149329613187762 GO:0030163_protein catabolic process_2.48134253952479e-33 GO:0050728_negative regulation of inflammatory response_0.000123690094873362 GO:0042542_response to hydrogen peroxide_0.0174012903183276 GO:0050777_negative regulation of immune response_0.0…
K=7_8	1	0.111111	13627 15481 69237 69719 666669 11837 57741 19989 67891 12607 18572 52513 52874 16418 27225 57750 67459 67848	Eef1a1 Hspa8 Gtpbp4 Cad Rplp0 Rpl7 Rpl4 Cebpz Pdcd11 Ddx56 D19Bwg1357e Eif6 Ddx24 Wdr12 Nvl Ddx55	GO:0051084_'de novo' posttranslational protein folding_0.00705360792736967 GO:0046777_protein autophosphorylation_0.0370836981849462 GO:0007229_integrin-mediated signaling pathway_0.0320622792009409 GO:0070925_organelle assembly_0.0145260289333665 GO:0042446_hormone biosynthetic process_9.17173227438073e-05 GO:0022613_ribonucleoprotein complex biogenesis_1.28417999472054e-08 GO:0006412_translatio…
K=14_2	1	0.111111	15481 23996 59025 21762 19181 230249 57296 110208 19185 23997 59029 66413 66997 69077 70247 26445 26440 26444	Hspa8 Psmc4 Usp14 Psmd2 Psmc2 AI314180 Psmd8 Pgd Psmd4 Psmd13 Psmd14 Psmd6 Psmd12 Psmd11 Psmd1 Psmb2 Psma1 Psma7	GO:0051084_'de novo' posttranslational protein folding_0.00793203647005246 GO:0042446_hormone biosynthetic process_0.00258499150678544 GO:0030163_protein catabolic process_2.65352328844436e-10 GO:0050728_negative regulation of inflammatory response_0.017372045817755 GO:0006767_water-soluble vitamin metabolic process_0.032917125787455 GO:0050777_negative regulation of immune response_0.01737204581…
K=7_9	1	0.105263	54401 20528 13382 104776 16828 18293 20916 229211 24067 264895 56284 56451 66052 66242 66945 67680 67834 78920 56551	Ywhab Slc2a4 Dld Aldh6a1 Ldha Ogdh Sucla2 Acad9 Srp54a Acsf2 Mrpl19 Suclg1 Sdhc Mrps16 Sdha Sdhb Idh3a Dlst Txn2	GO:0042593_glucose homeostasis_0.0260077230501812 GO:0051291_protein heterooligomerization_0.0433470174669385 GO:0009063_cellular amino acid catabolic process_0.0303702461109077 GO:0006612_protein targeting to membrane_0.0122546765355819 GO:0043648_dicarboxylic acid metabolic process_6.66338888450512e-20 GO:0007369_gastrulation_0.0276458437363806 GO:0006096_glycolysis_0.000264768687561772 GO:0015…
K=13_1	1	0.105263	20528 19053 19185 59029 26445 19172 19173 19175 19177 26440 26441 26442 26444 26446 26443 51792 19166 19170 19167	Slc2a4 Ppp2cb Psmd4 Psmd14 Psmb2 Psmb4 Psmb5 Psmb6 Psmb7 Psma1 Psma4 Psma5 Psma7 Psmb3 Psma6 Ppp2r1a Psma2 Psmb1 Psma3	GO:0042593_glucose homeostasis_0.0260077230501812 GO:0007059_chromosome segregation_0.0221752680966711 GO:0015758_glucose transport_0.016675542899484 GO:0030163_protein catabolic process_7.01094721462506e-32 GO:0050728_negative regulation of inflammatory response_0.00015533279833862 GO:0042542_response to hydrogen peroxide_0.0194290583420855 GO:0050777_negative regulation of immune response_0.000…
K=14_1	1	0.105263	20528 19053 19185 59029 26445 19172 19173 19175 19177 26440 26441 26442 26444 26446 26443 51792 19166 19170 19167	Slc2a4 Ppp2cb Psmd4 Psmd14 Psmb2 Psmb4 Psmb5 Psmb6 Psmb7 Psma1 Psma4 Psma5 Psma7 Psmb3 Psma6 Ppp2r1a Psma2 Psmb1 Psma3	GO:0042593_glucose homeostasis_0.0260077230501812 GO:0007059_chromosome segregation_0.0221752680966711 GO:0015758_glucose transport_0.016675542899484 GO:0030163_protein catabolic process_7.01094721462506e-32 GO:0050728_negative regulation of inflammatory response_0.00015533279833862 GO:0042542_response to hydrogen peroxide_0.0194290583420855 GO:0050777_negative regulation of immune response_0.000…
K=12_1	1	0.0952381	230249 20528 19053 110208 19185 59029 26445 19172 19173 19175 19177 26440 26441 26442 26444 26446 26443 51792 19166 19170 19167	AI314180 Slc2a4 Ppp2cb Pgd Psmd4 Psmd14 Psmb2 Psmb4 Psmb5 Psmb6 Psmb7 Psma1 Psma4 Psma5 Psma7 Psmb3 Psma6 Ppp2r1a Psma2 Psmb1 Psma3	GO:0042593_glucose homeostasis_0.0287065566210408 GO:0007059_chromosome segregation_0.0244814237058852 GO:0015758_glucose transport_0.0184151444352979 GO:0030163_protein catabolic process_9.7308273802324e-31 GO:0050728_negative regulation of inflammatory response_0.000190527403798047 GO:0006767_water-soluble vitamin metabolic process_0.0382986545505268 GO:0042542_response to hydrogen peroxide_0.0…
K=13_2	1	0.0952381	15481 23996 59025 21762 19181 230249 19358 21402 57296 110208 107182 19185 23997 59029 66413 66997 69077 70247 26445 26440 26444	Hspa8 Psmc4 Usp14 Psmd2 Psmc2 AI314180 Rad23a Skp1a Psmd8 Pgd Btaf1 Psmd4 Psmd13 Psmd14 Psmd6 Psmd12 Psmd11 Psmd1 Psmb2 Psma1 Psma7	GO:0051084_'de novo' posttranslational protein folding_0.00924831942085328 GO:0042446_hormone biosynthetic process_0.00406975373194527 GO:0030163_protein catabolic process_6.80579280708912e-14 GO:0050728_negative regulation of inflammatory response_0.0202387902657531 GO:0006767_water-soluble vitamin metabolic process_0.0382986545505268 GO:0050777_negative regulation of immune response_0.020238790…
K=11_3	1	0.0909091	15481 23996 59025 21762 19181 230249 19358 21402 57296 110208 107182 19185 23997 59029 66413 66997 69077 70247 22034 26445 26440 26444	Hspa8 Psmc4 Usp14 Psmd2 Psmc2 AI314180 Rad23a Skp1a Psmd8 Pgd Btaf1 Psmd4 Psmd13 Psmd14 Psmd6 Psmd12 Psmd11 Psmd1 Traf6 Psmb2 Psma1 Psma7	GO:0051084_'de novo' posttranslational protein folding_0.00968671805233761 GO:0042102_positive regulation of T cell proliferation_0.0243659222253523 GO:0002573_myeloid leukocyte differentiation_0.0230977609012568 GO:0042446_hormone biosynthetic process_0.00465830428182712 GO:0042108_positive regulation of cytokine biosynthetic process_0.0249994134511076 GO:0001843_neural tube closure_0.0344547936…
K=12_2	1	0.0909091	15481 23996 59025 21762 19181 230249 19358 21402 57296 110208 107182 19185 23997 59029 66413 66997 69077 70247 22034 26445 26440 26444	Hspa8 Psmc4 Usp14 Psmd2 Psmc2 AI314180 Rad23a Skp1a Psmd8 Pgd Btaf1 Psmd4 Psmd13 Psmd14 Psmd6 Psmd12 Psmd11 Psmd1 Traf6 Psmb2 Psma1 Psma7	GO:0051084_'de novo' posttranslational protein folding_0.00968671805233761 GO:0042102_positive regulation of T cell proliferation_0.0243659222253523 GO:0002573_myeloid leukocyte differentiation_0.0230977609012568 GO:0042446_hormone biosynthetic process_0.00465830428182712 GO:0042108_positive regulation of cytokine biosynthetic process_0.0249994134511076 GO:0001843_neural tube closure_0.0344547936…
K=11_2	1	0.0833333	230249 20528 19053 110208 19185 59029 66413 26445 108989 17219 19172 19173 19175 19177 26440 26441 26442 26444 26446 26443 51792 19166 19170 19167	AI314180 Slc2a4 Ppp2cb Pgd Psmd4 Psmd14 Psmd6 Psmb2 Tpr Mcm6 Psmb4 Psmb5 Psmb6 Psmb7 Psma1 Psma4 Psma5 Psma7 Psmb3 Psma6 Ppp2r1a Psma2 Psmb1 Psma3	GO:0042593_glucose homeostasis_0.0327410889585812 GO:0007059_chromosome segregation_0.0279307171415727 GO:0015758_glucose transport_0.02101896991701 GO:0071103_DNA conformation change_0.0230974239212958 GO:0030163_protein catabolic process_2.31445314200267e-29 GO:0050728_negative regulation of inflammatory response_0.000249950490681213 GO:0006767_water-soluble vitamin metabolic process_0.04365070…

## Sheet: S_Table3A
CORUM_ID	Complex_name	P_val	hits	diff_score	Hit_names
351	Spliceosome	0	15	1.3244	Snw1 Srsf5 Acin1 Cpsf6 Srsf3 Sf3b1 Bcas2 Srsf6 Dhx9 Srsf1 Prpf4 Snrpd1 Puf60 Prpf40a Ddx3x
3055	Nop56p-associated pre-rRNA complex	0	10	1.34217	Nop58 Tubb1 Fbl Dhx9 Ilf2 Hnrnpu Nolc1 Rpl13 Rpl10a Top1
1183	CDC5L complex	0	9	1.17972	Hspa8 Sf3b1 Sfpq Bcas2 Srsf1 Ilf2 Snrpd1 Ppp1ca Tcf4
1181	C complex spliceosome	0	7	1.21349	Snw1 Sf3b1 Srsf1 Hnrnpu Snrpd1 Hnrnph1 Hnrnpa3
1332	Large Drosha complex	0	6	1.29346	Tardbp Ilf2 Hnrpdl Hnrnpu Hnrnph1 Ddx3x
5615	Emerin complex 52	0	5	1.41249	Ywhae Lmnb1 Hist1h1a Hnrnpu Snrpd1
2755	17S U2 snRNP	0	4	1.1992	Sf3b1 Srsf1 Snrpd1 Puf60
87	Nup 107-160 subcomplex	0	3	2.09899	Nup133 Nup98 Nup43
3082	DGCR8 multiprotein complex	0	3	1.63551	Dhx9 Hnrnpu Hnrnph1
2837	Profilin 1 complex	0	3	1.50818	Hspa8 Cltc Actg1
5613	Emerin complex 25	0	3	1.43693	Ywhae Lmnb1 Snrpd1
189	BAF complex	0	3	1.20105	Smarce1 Actl6b Actg1
149	PBAF complex (Polybromo- and BAF containing complex)	0	3	1.20105	Smarce1 Actl6b Actg1
1257	ALL-1 supercomplex	0	2	1.66022	Ran Smarca5
1182	CDC5L core complex	0	2	1.40189	Hspa8 Bcas2
1148	snRNP-free U1A (SF-A) complex	0	2	1.36868	Sfpq Nono
5608	Emerin architectural complex	0	2	1.33626	Lmnb1 Lmna
5199	Kinase maturation complex 1	0	2	1.33058	Ywhae Ywhag
5919	BRAF-RAF1-14-3-3 complex	0	2	1.33058	Ywhae Ywhag
5184	SWI/SNF chromatin-remodeling complex	0	2	1.26709	Smarce1 Mecp2
1166	p400-associated complex	0	2	1.24138	Actl6b Ruvbl1
5177	Polycystin-1 multiprotein complex (ACTN1, CDH1, SRC, JUP, VCL, CTNNB1, PXN, BCAR1, PKD1, PTK2, TLN1)	0	2	1.21228	Vcl Tln1
632	Anti-HDAC2 complex	0	2	1.14349	Gtf2i Chd4
799	DMAP1-associated complex	0	2	1.11911	Srcap Ruvbl1
778	LARC complex (LCR-associated remodeling complex)	0	2	1.05406	Smarce1 Chd4
282	SNF2h-cohesin-NuRD complex	0	1	2.26565	Smarca5
1106	TFIIIC containing-TOP1-SUB1 complex	0	1	1.77045	Top1
5449	Splicing-associated factors complex	0	1	1.24036	Dek
5260	TCF4-CTNNB1-SUMO1-EP300-HADAC6 complex	0	1	1.22873	Tcf4
1413	NCOR1 complex	0	1	1.12116	Srcap
525	TIP60 histone acetylase complex	0	1	1.11707	Ruvbl1
787	NuA4/Tip60-HAT complex B	0	1	1.11707	Ruvbl1
685	MeCP1 complex	0	1	1.08645	Chd4
1230	WINAC complex	0	1	1.02167	Smarce1
1737	SF3b complex	0	1	1.01647	Sf3b1
929	CEN complex	0.001	4	1.51961	Rsf1 Fbl Hspa8 Smarca5
725	P2X7 receptor signalling complex	0.001	2	1.39108	Hspa8 Actn4
2589	PGC-1-SRp40-SRp55-SRp75 complex	0.001	2	1.21695	Srsf5 Srsf6
520	KCNQ1 macromolecular complex	0.001	2	1.15099	Ppp1ca Ppp1cb
430	18S U11/U12 snRNP	0.001	2	1.10247	Sf3b1 Snrpd1
2721	HCF-1 complex	0.001	1	1.68609	Hspa8
5266	TNF-alpha/NF-kappa B signaling complex 6	0.001	1	1.12104	Fbl
1170	cMYC-ATPase-helicase complex	0.001	1	1.11707	Ruvbl1
5183	DNA-PK-Ku-eIF2-NF90-NF45 complex	0.001	1	1.09428	Ilf2
61	Mi2/NuRD complex	0.001	1	1.08645	Chd4
888	MTA2 complex	0.001	1	1.08645	Chd4
238	SWI-SNF chromatin remodeling-related-BRCA1 complex	0.001	1	1.02167	Smarce1
86	NUMAC complex (nucleosomal methylation activator complex)	0.001	1	1.02167	Smarce1
714	BRM-SIN3A complex	0.001	1	1.02167	Smarce1
1239	EBAFb complex	0.001	1	1.02167	Smarce1

## Sheet: S_Table3B
GO Term ID	GO Term Description	No. of Clusters
GO:0006338	chromatin remodeling	39
GO:0006333	chromatin assembly or disassembly	39
GO:0010553	negative regulation of gene-specific transcription from RNA polymerase II promoter	25
GO:0006334	nucleosome assembly	25
GO:0048011	nerve growth factor receptor signaling pathway	21
GO:0040029	regulation of gene expression, epigenetic	21
GO:0042733	embryonic digit morphogenesis	20
GO:0051153	regulation of striated muscle cell differentiation	19
GO:0007399	nervous system development	19
GO:0043967	histone H4 acetylation	19
GO:0048641	regulation of skeletal muscle tissue development	17
GO:0006366	transcription from RNA polymerase II promoter	17
GO:0009408	response to heat	17
GO:0030521	androgen receptor signaling pathway	17
GO:0007411	axon guidance	17
GO:0045862	positive regulation of proteolysis	15
GO:0034332	adherens junction organization	14
GO:0051084	'de novo' posttranslational protein folding	13
GO:0031345	negative regulation of cell projection organization	12
GO:0006406	mRNA export from nucleus	12
GO:0006986	response to unfolded protein	10
GO:0031124	mRNA 3'-end processing	10
GO:0043488	regulation of mRNA stability	10
GO:0000278	mitotic cell cycle	9
GO:0000904	cell morphogenesis involved in differentiation	9
GO:0022618	ribonucleoprotein complex assembly	9
GO:0031175	neuron projection development	9
GO:0043487	regulation of RNA stability	8
GO:0000086	G2/M transition of mitotic cell cycle	8
GO:0032434	regulation of proteasomal ubiquitin-dependent protein catabolic process	8
GO:0071445	cellular response to protein stimulus	8
GO:0034763	negative regulation of transmembrane transport	7
GO:0006915	apoptosis	7
GO:0007229	integrin-mediated signaling pathway	7
GO:0016571	histone methylation	7
GO:0046823	negative regulation of nucleocytoplasmic transport	7
GO:0007093	mitotic cell cycle checkpoint	7
GO:0033044	regulation of chromosome organization	7
GO:0071363	cellular response to growth factor stimulus	7
GO:0090317	negative regulation of intracellular protein transport	6
GO:0032768	regulation of monooxygenase activity	6
GO:0000079	regulation of cyclin-dependent protein kinase activity	6
GO:0060338	regulation of type I interferon-mediated signaling pathway	6
GO:0000236	mitotic prometaphase	6
GO:0006921	cellular component disassembly involved in apoptosis	6
GO:0061138	morphogenesis of a branching epithelium	6
GO:0048754	branching morphogenesis of a tube	5
GO:0007160	cell-matrix adhesion	5
GO:0010906	regulation of glucose metabolic process	5
GO:0007268	synaptic transmission	5

## Sheet: S_Table4
clust_ID	Predicted	members(entrez)	p-value
126	Predicted	2.11674e+35	0.01
377	Predicted	2.2683e+16	0.001
683	Predicted	7425622036224610	0.001
152	Predicted	1.70892e+39	0.02
310	Predicted	146091411418133	0.005
134	Predicted	3.20333e+37	0.012
123	Predicted	2.14132e+39	0.016
159	Predicted	114646400912333	0.001
20	Predicted	2.26302e+60	0.038
245	Predicted	1.55072e+20	0.002
578	Predicted	2.17124e+16	0.002
437	Predicted	2144987757868910	0.001
86	Predicted	1.92422e+35	0.013
11	Predicted	22346,66694,13063,12858,66945,66445,110842,67680,17995,69089,13382,227197,56551,672195,53382,17993,170718,98258,69802,14297,18674,624814,68349,225887,72900,67273,12974,11946,76614,18597,623286,407785,66108,68263,56454,11364,15108,270076,110826,66043,15528,17713,14194,11637,15929,18293,628438,108156,11429,67834,12039,53895,17448,21856,73078,72039,66916,97212,56451	0.022
0	Predicted	5.44012e+106	0
135	Predicted	2.39421e+41	0.019
285	Predicted	5.64242e+19	0.003
606	Predicted	1253212795211130	0.004
651	Predicted	6.68602e+16	0
295	Predicted	3.47722e+21	0.001
467	Predicted	1.38221e+19	0.005
59	Predicted	1.09712e+79	0
322	Predicted	679031791350778	0.002
482	Predicted	1.15542e+20	0.005
371	Predicted	1.23141e+31	0.01
6	Predicted	1.48122e+129	0
644	Predicted	192831724211519	0.001
374	Predicted	1.16837e+16	0.002
27	Predicted	1.03574e+173	0.002
613	Predicted	2.69116e+16	0
500	Predicted	749981791953868	0.001
52	Predicted	2.40514e+41	0.016
244	Predicted	2.26252e+22	0
84	Predicted	1.90457e+36	0
33	Predicted	5.61943e+163	0
519	Predicted	1.97242e+19	0.004
54	Predicted	1.75357e+78	0.049
10	Predicted	1.23876e+64	0.042
433	Predicted	1.69062e+20	0.004
197	Predicted	3.19505e+26	0.006
464	Predicted	1.63322e+19	0.009
139	Predicted	1.24171e+62	0.043
4	Predicted	56489,245841,68092,76936,27366,18521,108014,20826,53379,229279,20384,57317,21681,18789,23983,22608,20383,269061,54451,66125,68479,51786,74737,20624,15381,66055,108062,56258,98758,70233,22185,110519,20639,11991,59013,15387,20638,20382,83486,19655,110809,81898,320632,60365,68219,67465,108121,68011,94230,68879,70052,75062,20222,71713,69878,107686,64340,74351,101943,54196,74164,98985,67337,319322,206…	0
620	Predicted	2.23435e+17	0.003
678	Predicted	2161511527821780	0.002
73	Predicted	6.77812e+34	0.016
333	Predicted	2.08422e+32	0.009
601	Predicted	1.10052e+17	0.005
200	Predicted	8.02801e+19	0.006
422	Predicted	2123077649956430	0.004
90	Predicted	1.64382e+35	0.008
173	Predicted	2.23302e+20	0.004
592	Predicted	2.07392e+20	0
639	Predicted	169111682694242	0
24	Predicted	1.33851e+82	0.011
157	Predicted	2213811733380690	0.002
35	Predicted	1.34241e+135	0.001
17	Predicted	2.23522e+36	0.015
43	Predicted	9.42321e+36	0.017
80	Predicted	1.66652e+55	0.028
267	Predicted	6.63547e+34	0
403	Predicted	1.87177e+19	0.002
237	Predicted	2.17702e+19	0.001
55	Predicted	2.21453e+41	0.003
364	Predicted	2.6886e+21	0.003
69	Predicted	2.18722e+39	0.021
87	Predicted	1.23221e+41	0
29	Predicted	1.14591e+36	0.015
133	Predicted	1.81001e+66	0.003
282	Predicted	5.64227e+20	0.005
2	Predicted	22034,11461,22333,14828,15481,15510,20174,56505,19181,19179,67089,23996,19184,24015,11947,66821,69597,270166,269523,19182,224742,26425,20479,108888,72151,18971,23834,69263,19687,17688,18861,50850,18973,13006,27377,74254,17250,17220,19718,24061,19361,19299,18968,77987,74142,69716,19356,78394,21973,19704,71743,107932,18195,56495,15526,12144,19714,14156,22791,17219,17216,17218,19366,18974,16881,1254…	0.019
145	Predicted	6.36545e+44	0.017
37	Predicted	1.18208e+75	0.006
355	Predicted	1.16838e+31	0.015

## Sheet: S_Table5
Entrez	Links
22631	6
20779	5
22330	5
13627	4
18750	4
19060	4
22145	4
22153	4
22218	4
22628	4
26413	4
331026	4
69719	4
78920	4
11966	3
12626	3
15929	3
18033	3
18751	3
18754	3
20020	3
21374	3
218543	3
22059	3
26417	3
269623	3
51869	3
56194	3
56455	3
59004	3
67738	3
72354	3
72554	3
100986	2
103573	2
109006	2
110157	2
110651	2
110809	2
11429	2
114741	2
11928	2
12387	2
12767	2
13001	2
13163	2
13498	2
13518	2
13722	2
14694	2
15239	2
16452	2
16785	2
17279	2
18015	2
18107	2
18226	2
18386	2
18458	2
18538	2
18746	2
18747	2
18752	2
18753	2
18783	2
19047	2
19052	2
19087	2
19166	2
19167	2
19177	2
19317	2
19877	2
20102	2
20193	2
20239	2
20742	2
20833	2
212448	2
216848	2
21753	2
21770	2
21872	2
21973	2
22139	2
22185	2
22380	2
224997	2
229906	2
230737	2
233489	2
244667	2
268709	2
27050	2
320632	2
434401	2
52686	2
53605	2
54132	2
54387	2
545592	2
56070	2
56470	2
57741	2
58520	2
60321	2
666669	2
66860	2
67279	2
67747	2
69207	2
70428	2
71514	2
71702	2
71801	2
71805	2
77578	2
84505	2
94062	2

## Sheet: S_Table6
0.92718	0.00342549	1.05166	0.878767	0.000103078	1.06681	0.901128	0.0122076	1.08449
1.19455	6.95982e-06	1.07717	1.571	1.96512e-14	1.10515	1.47249	4.31662e-10	1.11664
1.08442	0.00114452	1.04949	0.790051	4.14527e-13	1.0624	0.842992	5.549e-06	1.07486
1.0962	0.00946384	1.07042	1.34539	2.13334e-09	1.09416	1.21228	4.6275e-06	1.08161
1.13425	0.422318	1.44882	1.39819	0.207813	1.78801	1.32803	0.313244	1.87898
1.18106	0.000321109	1.09184	1.47978	2.97984e-09	1.12512	1.35234	2.58668e-06	1.12608
1.07524	0.0539335	1.07604	0.859244	0.000595127	1.08878	0.986107	0.79136	1.10904
1.05909	0.295025	1.11605	0.965246	0.545206	1.12463	0.973169	0.721616	1.16616
0.876901	0.000125208	1.0682	1.02924	0.456995	1.07878	1.02873	0.515136	1.08889
1.00833	0.875383	1.112	0.64462	1.21388e-07	1.14823	0.749354	3.03275e-05	1.13236
1.00493	0.851925	1.0529	0.95863	0.242346	1.07316	0.903354	0.0192946	1.08807
1.02987	0.455137	1.08167	1.03482	0.462377	1.09714	0.94357	0.207183	1.09554
1.01073	0.786878	1.08149	0.805581	3.31178e-05	1.1024	0.823575	0.00211746	1.12919
1.04303	0.238433	1.07318	1.30051	2.76319e-09	1.08161	1.29547	2.58819e-07	1.09594
0.932378	0.178156	1.10816	1.10341	0.0842213	1.11851	1.07251	0.1936	1.11215
1.0935	0.0168035	1.07557	0.936377	0.133195	1.09006	0.893953	0.0179455	1.09671
1.24244	0.000793889	1.12745	1.31145	0.000414154	1.1518	1.30876	0.000184862	1.13993
0.935324	0.185853	1.10533	0.797016	3.52836e-05	1.10636	0.756455	7.94538e-06	1.12015
0.962079	0.347502	1.08365	0.965377	0.378048	1.0812	0.931479	0.168729	1.10571
1.29467	0.00024394	1.1381	1.61728	8.25276e-07	1.18519	1.3096	0.0024531	1.18416
0.953497			0.724505			0.708569
1.029	0.426712	1.0728	0.896798	0.0477938	1.11285	0.877999	0.0561613	1.14154
0.917705	0.0980128	1.10792	1.01315	0.828808	1.12862	0.95145	0.416181	1.12987
1.17607	0.00221057	1.10631	1.1713	0.0179812	1.13872	1.25933	0.00318544	1.16154
						2.16705
1.00774	0.846652	1.08291	1.03365	0.476197	1.0968	1.00175	0.974521	1.11578
1.0579	0.331611	1.12363	1.00171	0.977657	1.13184	1.05118	0.481039	1.15328
0.98394	0.656128	1.07575	1.12375	0.147034	1.17275	1.11099	0.150842	1.1562
0.923515	0.119377	1.10627	1.02543	0.603909	1.10142	1.0305	0.562105	1.10906
0.897452	0.264638	1.22458	0.887372	0.115848	1.16554	0.829287	0.0686863	1.22595
